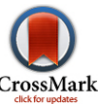

# Deciphering the *Cis*-Regulatory Elements for XYR1 and CRE1 Regulators in *Trichoderma reesei*

Rafael Silva-Rocha<sup>1</sup>, Lilian dos Santos Castro<sup>1</sup>, Amanda Cristina Campos Antoniêto<sup>1</sup>, María-Eugenia Guazzaroni<sup>2</sup>, Gabriela Felix Persinoti<sup>1</sup>, Roberto Nascimento Silva<sup>1\*</sup>

**1** Department of Biochemistry and Immunology, FMRP - University of São Paulo, Ribeirão Preto, São Paulo, Brazil, **2** Department of Biochemistry, FFCLRP - University of São Paulo, Ribeirão Preto, São Paulo, Brazil

## Abstract

In this work, we report the *in silico* identification of the *cis*-regulatory elements for XYR1 and CRE1 proteins in the filamentous fungus *Trichoderma reesei*, two regulators that play a central role in the expression of cellulase genes. Using four datasets of condition-dependent genes from RNA-seq and RT-qPCR experiments, we performed unsupervised motif discovery and found two short motifs resembling the proposed binding consensus for XYR1 and CRE1. Using these motifs, we analysed the presence and arrangement of putative *cis*-regulatory elements recognized by both regulators and found that shortly spaced sites were more associated with XYR1- and CRE1-dependent promoters than single, high-score sites. Furthermore, the approach used here allowed the identification of the previously reported XYR1-binding sites from *cel7a* and *xyn1* promoters, and we also mapped the potential target sequence for this regulator at the *cel6a* promoter that has been suggested but not identified previously. Additionally, seven other promoters (for *cel7b*, *cel61a*, *cel61b*, *cel3c*, *cel3d*, *xyn3* and *swo* genes) presented a putative XYR1-binding site, and strong sites for CRE1 were found at the *xyr1* and *cel7b* promoters. Using the *cis*-regulatory architectures nearly defined for XYR1 and CRE1, we performed genome-wide identification of potential targets for direct regulation by both proteins and important differences on their functional regulons were elucidated. Finally, we performed binding site mapping on the promoters of differentially expressed genes found in *T. reesei* mutant strains lacking *xyr1* or *cre1* and found that indirect regulation plays a key role on their signalling pathways. Taken together, the data provided here sheds new light on the mechanisms for signal integration mediated by XYR1 and CRE1 at cellulase promoters.

**Citation:** Silva-Rocha R, Castro LdS, Antoniêto ACC, Guazzaroni M-E, Persinoti GF, et al. (2014) Deciphering the *Cis*-Regulatory Elements for XYR1 and CRE1 Regulators in *Trichoderma reesei*. PLoS ONE 9(6): e99366. doi:10.1371/journal.pone.0099366

**Editor:** Joel S. Bader, Johns Hopkins University, United States of America

**Received:** February 13, 2014; **Accepted:** May 13, 2014; **Published:** June 18, 2014

**Copyright:** © 2014 Silva-Rocha et al. This is an open-access article distributed under the terms of the Creative Commons Attribution License, which permits unrestricted use, distribution, and reproduction in any medium, provided the original author and source are credited.

**Funding:** This work was supported by The State of São Paulo Research Foundation (FAPESP, 2010/15683-8). RS-R holds a FAPESP post-doctoral Fellowship (FAPESP, 2013/04125-2). MEG benefits from a Young Talent Fellowship of the National Council of Technological and Scientific Development (CNPq, Ref. Number 370630/2013-0). The funders had no role in study design, data collection and analysis, decision to publish, or preparation of the manuscript.

**Competing Interests:** The authors have declared that no competing interests exist.

\* E-mail: rsilva@fmrp.usp.br

## Introduction

*Trichoderma reesei* is a filamentous fungus extremely relevant to biotechnology due to its remarkable capability to produce a wide number of cellulolytic enzymes [1,2]. This mesophilic organism is endowed with a tremendous repertoire of hydrolytic enzymes related to the deconstruction of lignocellulosic biomass from plants that are of high importance for biotech processes such as paper industry or fuel production [3,4,5]. Due to its elevated biotechnological potential, *T. reesei* has been extensively studied in the past decades as a model of cellulases and hemicellulases producing organism [6,7,8,9]. This organism is endowed with different classes of biomass-related hydrolytic enzymes (here, collectively referred as cellulases), and special attention has been placed on enzymes such as endoglucanases (Cel7b, Cel5a, Cel12a, Cel61a and Cel45a), sGH61 polysaccharide monooxygenase (PMOs, Cel61a and Cel61b), exoglucanases (Cel7a and Cel6a),  $\beta$ -glucosidases (Cel3a and Cel1a), endo- $\beta$ -1,4-xylanases (XYN1 and XYN2) and  $\beta$ -xylosidase (BXL1). From this particular set of enzymes, Cel7a, Cel6a, Cel7b and Cel5a are the most abundantly produced under inducing conditions such as growth in the

presence of cellulose or sophorose (a glucose disaccharide produced during cellulose degradation; [6]).

In order to allow the rational engineering of new strains of *T. reesei* with enhanced enzyme production levels, a great interest has been to elucidate the molecular mechanisms operating at the transcriptional network that controls the expression of cellulase genes in response to the cognate environmental conditions [6,10,11,12,13,14]. These efforts have allowed the identification of many regulatory proteins and signalling pathways that are responsible for the coordination of cellulase expression in this fungus [15,16,17,18,19,20]. For some of the enzymes mentioned above, at least three mechanistic steps take place at the promoter regions: chromatin reorganization, de-repression and induction [2,6]. Chromatin reorganization is related to the dynamic positioning of nucleosomes in response to environmental or physiologic signals [21]. In Eukaryotes, nucleosomes are important players in gene regulation since their binding to DNA segments is able to lock the chromatin in a blocked state, where transcriptional factors (TFs) cannot interact with the *cis*-regulatory elements located in the region occupied by the nucleosome [22,23,24]. In fact, this process has been shown to regulate the basal expression

levels of cellulase promoters in *T. reesei* [25,26]. As a second step, de-repression is related to the increase in the basal promoter expression level in response to the removal of a repressive signal [6,10,27,28]. In the case of cellulases, carbon catabolite repression (CCR) is mediated by alternative carbon source of easy degradation, such as glucose [10,20,27,28]. In this sense, the modulation of the promoter activity during CCR has been postulated to occur mainly through changing of the chromatin state of the target promoter [25,26]. Finally, the third mechanism involves the induction of high promoter activities in response to some signals (in the case of cellulases, the enzyme substrates) that is mediated by general and specific TFs [6,13,17,29].

The investigation of the regulatory network for cellulase expression in *T. reesei* has allowed the identification of several TFs related to each of the mechanisms described above. For instance, the XYR1 (*xylanase regulator 1*) transcriptional factor is the main positive regulator of cellulase expression in *T. reesei* [11,19], and homologues of this protein performs the same role in other cellulase producing organisms such as *Aspergillus niger* and *Neurospora crassa* [30,31]. XYR1 is a zinc binuclear cluster protein that is able to bind to several cellulase promoters and is virtually essential for full expression of these genes during growth under inducing conditions [11,19]. Moreover, XYR1 production is also regulated at the transcriptional level by the carbon catabolite repressor CRE1 protein [17] and is repressed by the specific transcriptional factor ACE1 [32,33]. CRE1 is a Cys2His2 type transcriptional factor that is responsible to mediate glucose dependent CCR at several cellulase promoters [10,20]. This regulator is an homologue of the CCR protein Mig1 from *Saccharomyces cerevisiae* [34] and affects chromatin organization at target promoters in response to glucose [25,26]. In turn, ACE1 contains three Cys2His2-type zinc fingers and also regulate other cellulase genes such as Cel7a and XYN1 apparently through the interference with the binding of XYR1 at targets promoters [29,32]. In addition to the above cited proteins, additional regulators required for the expression of cellulase genes are the HAP2/3/5 complex, which is necessary to generate an open chromatin structure that is essential for full promoter activation, [26,29,35,36] and the zinc binuclear cluster protein ACE2, which is a specific cellulase activator that only occurs in *T. reesei* [17,36,37].

Current available experimental data related to cellulase regulation in *T. reesei* clearly evidence sophisticate interplay between the characterized and unknown TFs at the target promoters to provide fine-tuning of enzyme production levels in this organism [6,38]. Yet, the mechanisms by which the regulators at stake interact with the target *cis*-regulatory elements at each particular promoter are only beginning to be elucidated [11,18,36,39,40]. For instance, the consensus binding sequences of the two main cellulase regulators XYR1 and CRE1 (5'-GGCWW-3' and 5'-SYGGRG-3', respectively) have been proposed on the basis of the comparison with homologous regulators from other organisms [41] or cannot be used to distinguish between genes regulated or not by these regulators [11]. Thus, quantitative information on the *cis*-regulatory elements associated with the interaction of XYR1 and CRE1 with their target promoters is crucial to improve engineering attempts to construct new cellulase responsive promoters [12,42,43] and to understand the role of these regulators in *T. reesei* at the global scale [10,11]. In this work, we analysed four sets of co-regulated genes identified using RNA deep sequencing (RNA-seq) and Real Time quantitative PCR (RT-qPCR) from *T. reesei* cells grown in the presence of inducers (cellulose and sophorose) and a repressor (glucose) carbon sources. Separated analysis of the different datasets allowed the identification of new DNA motifs that were

associated with the regulation by XYR1 and CRE1 in this organism. The nearly revealed motifs were used to generate, by the first time, Position Weight Matrixes (PWMs) representing the putative *cis*-regulatory elements recognized by both regulators. Furthermore, these PWMs were used to inspect the architecture of target promoters in co-expressed genes at the genomic scale, allowing the identification of the functional regulons of XYR1 and CRE1 in *T. reesei*. The PWMs generated here were able to successfully identify two previously characterized *cis*-regulatory elements at the *cel7a* and *xyn1* promoters [25,29], as well as to find a new regulatory region at the *cel6a* promoter that agrees with previous *in vivo* data [26]. Taken together, the results provided here add valuable information on the regulatory scope of XYR1 and CRE1 in *T. reesei* at the genomic scale, revealing some important differences with other filamentous fungus [8,30,44] and providing new clues on the molecular mechanisms of promoter recognition by these regulators.

## Materials and Methods

### Experimental Datasets

The analysis of *cis*-regulatory elements was performed using four groups of co-regulated genes identified using different experimental setups. Three groups represent genes encoding TFs that were identified using RNA-seq [45] from cells growing in cellulose (7

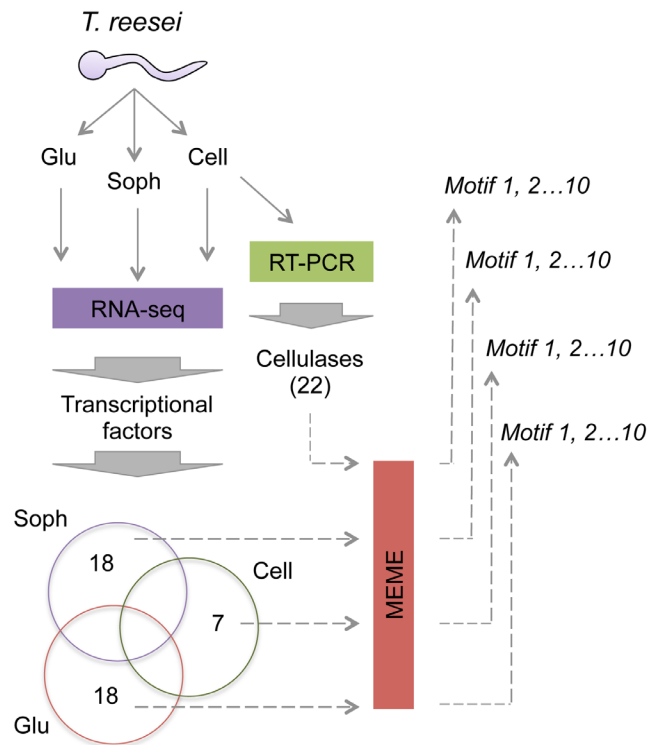

**Figure 1. Schematic representation of the approach used for motif discovery in *T. reesei*.** Three sets of co-regulated genes were retrieved from RNA-seq experiments of *T. reesei* cells grown on cellulose, sophorose or glucose [45]. Only up-regulated genes encoding for putative TFs were selected. A fourth set of genes are 22 cellulases analysed through RT-PCR experiments [46]. A 1.5 kb promoter region of each gene from the four groups was retrieved from the complete genome sequence [49] and used for motif discovery using MEME. From the resulting identified motifs, those sharing similarities with the reported binding consensus for XYR1 and CRE1 were selected for further analysis.

doi:10.1371/journal.pone.0099366.g001

genes), sophorose (18 genes) or glucose (18 genes) as sole carbon sources and that were specifically up regulated. The lists of genes from these groups are given in **Tables S1 to S3** from Supporting Information. The fourth group is represented by 22 cellulases-encoding genes whose promoters are regulated by the XYR1 regulator [46]. For each of the 65 analysed genes, a 1.5 kb DNA sequence immediately upstream of ATG codons was retrieved from the complete genome sequence of *T. reesei* available at the JGI homepage (<http://genome.jgi-psf.org/Trire2/Trire2.home.html>) using *ad hoc* Perl scripts. These sequences are expected to contain the *cis*-regulatory elements for the different TFs acting on each gene. The four groups of fasta sequences were then used to identify conserved DNA motifs as described below. The overall approach used in this work is represented in **Fig. 1**.

**De novo Motif Discovery**

In order to identify new *cis*-regulatory elements in the four regulons assayed, we analysed the promoter sequences using the MEME tool [47]. For MEME analysis, we set the parameters to search for short DNA motifs (6 to 10 nt in length) expected to occur zero or one time per sequence at forward or reverse strand, allowing a maximal of ten different motifs to be reported by the program. From the resulting outputs, motifs displaying similarities with the DNA binding sites of XYR1 and CRE1 from *T. reesei* were selected. In cases where similar DNA consensus for the

regulators appeared on different motif outputs, the aligned sequences were merged to create a single motif dataset. The resulting datasets were used to construct Position Weight Matrixes (PWM) by extracting the information content of the sequence alignments as described previously [48]. For XYR1, a PWM representing the first 8-nt of the motif (**Fig. 2B**) was used, while for CRE1, a PWM containing the complete 10-nt motif (**Fig. 2D**) was constructed. The two resulting PWMs (named PWM<sub>XYR1</sub> for XYR1 and PWM<sub>CRE1</sub> for CRE1 regulators) were used for further analysis.

**Genome-wide Analysis of *Cis*-regulatory Elements**

The two PWMs generated using the motifs discovered with MEME were used to analyse the promoters of all annotated genes in the genome of *T. reesei* [49]. For this, promoters of 1.5 kb in length for the ~9,000 genes of *T. reesei* were analysed to identify the best motif for both PWMs on each promoter. Next, the same dataset was re-analysed to identify multiple motifs per promoter with a score above a specific threshold, which was set to 6.2 for PWM<sub>XYR1</sub> and 8.0 for PWM<sub>CRE1</sub>. The resulting identified sites were then analysed to identify adjacent *cis*-regulatory elements located within short distances (lower than 30 bp) with architectures similar to previously related functional sites for XYR1 and CRE1 regulators [11,18,25,29,37,50,51]. Additionally, the same workflow (i.e., identification of the best site, mapping of multiple sites

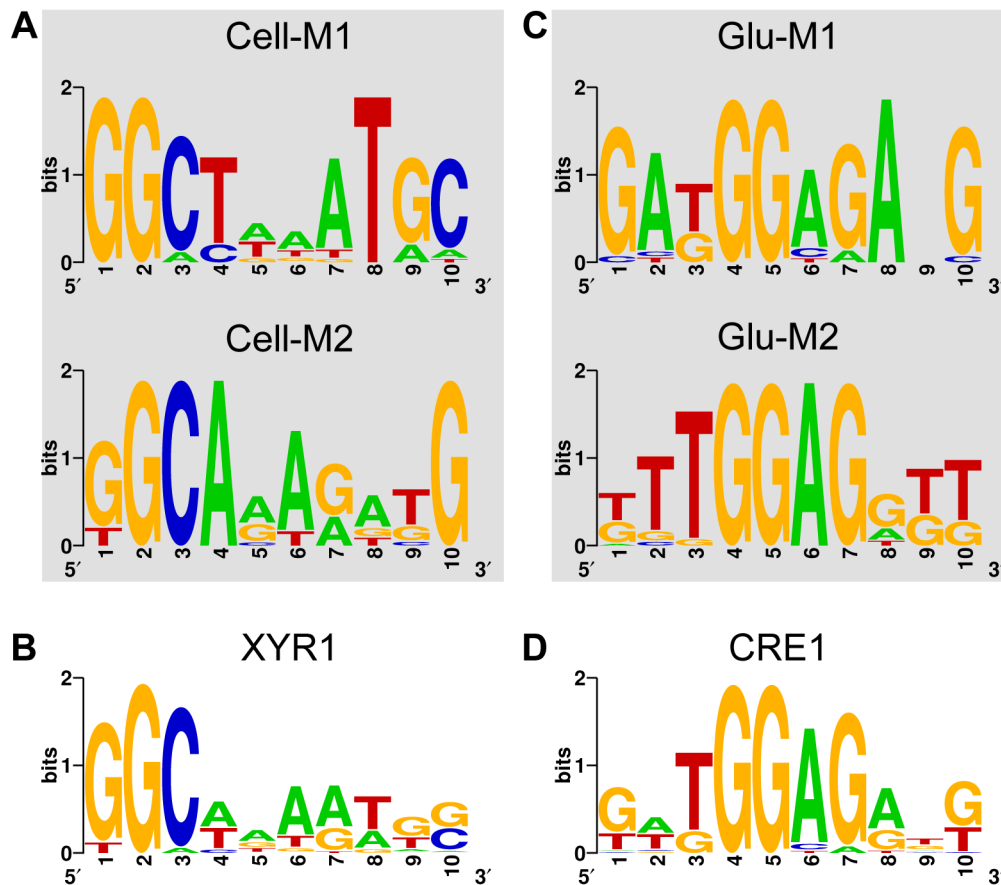

**Figure 2. Motifs identified in the cellulose and glucose regulated genes. A)** The two motifs identified in the promoter dataset of 22 cellulases that resemble the XYR1 consensus (5'-GGCWWW-3') are shown. **B)** Combination of the Cell-M1 and Cell-M2 motifs to create the XYR1 consensus used to search for XYR1 binding sites in *T. reesei*. **C)** The two motifs identified using the promoters of TFs up regulated under glucose growth that share similarity to the proposed CRE1-binding consensus (5'-SYGGRG-3') are shown. **D)** Representation of the consensus resulting from the combination of Glu-M1 and Glu-M2 motifs. doi:10.1371/journal.pone.0099366.g002

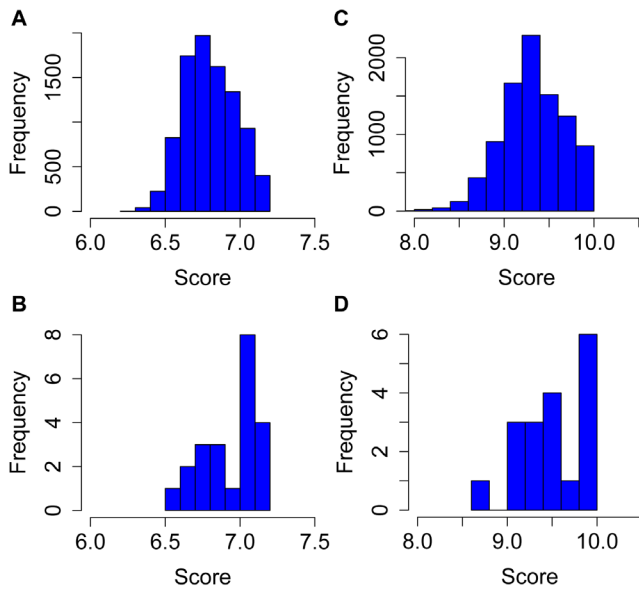

**Figure 3. Search for single XYR1 and CRE1 binding sites on different promoter datasets.** For the analysis, only the best site was retrieved for each studied promoter. **A)** Distribution of XYR1-binding sites score for all genes from the *T. reesei* genome. **B)** Score of XYR1-binding sites at the 22 cellulase promoters. **C)** Distribution of CRE1-binding sites scores at the genome scale. **D)** Scores of CRE1-binding sites found at the 18 promoters from the glucose dataset. doi:10.1371/journal.pone.0099366.g003

and the search for adjacent elements) was applied to the promoters of the 18 genes from the Glucose dataset and the 22 cellulases

promoters using both PWMs. Finally, two additional datasets, representing genes differentially expressed by growth on cellulose, sophorose and glucose in *Δxyr1* and *Δcre1* mutants of *T. reesei*, were inspected as described above to determine genes potentially and directly regulated by XYR1 (in the case of cellulose and sophorose growth conditions) and CRE1 (for glucose growth).

**Results and Discussion**

**Discovery of Putative Cis-regulatory Elements in Co-regulated Genes in *T. reesei***

In order to gain quantitative information on the *cis*-regulatory elements of XYR1 and CRE1 in *T. reesei*, we used four different datasets of co-regulated genes to search for short repetitive DNA motifs potentially recognized by these regulators. For this, we used RNA-seq data from *T. reesei* cells grown on cellulose, sophorose and glucose as sole carbon sources [45]. Raw sequence data and count data for all samples are available at Gene Expression Omnibus (GEO database) under the accession number GSE53629. Within the differentially expressed genes identified in each condition, we selected only those encoding for TFs and that were up regulated in the different carbon sources. This procedure leads to the identification of 7, 18 and 18 TF-encoding genes on cellulose, sophorose and glucose growth conditions, respectively (Table S1–S3). It is worth mentioning that we focussed on TF-encoding genes since they could mediate the regulation by XYR1 or CRE1 in an indirect way [6]. In addition to these three datasets, we used a fourth group formed by 22 cellulase-encoding genes whose expression was impaired in a strain of *T. reesei* lacking a functional *xyr1* gene [46]. Using these datasets, we could then search for DNA motifs that are similar between the different group of genes and those which are specific to each

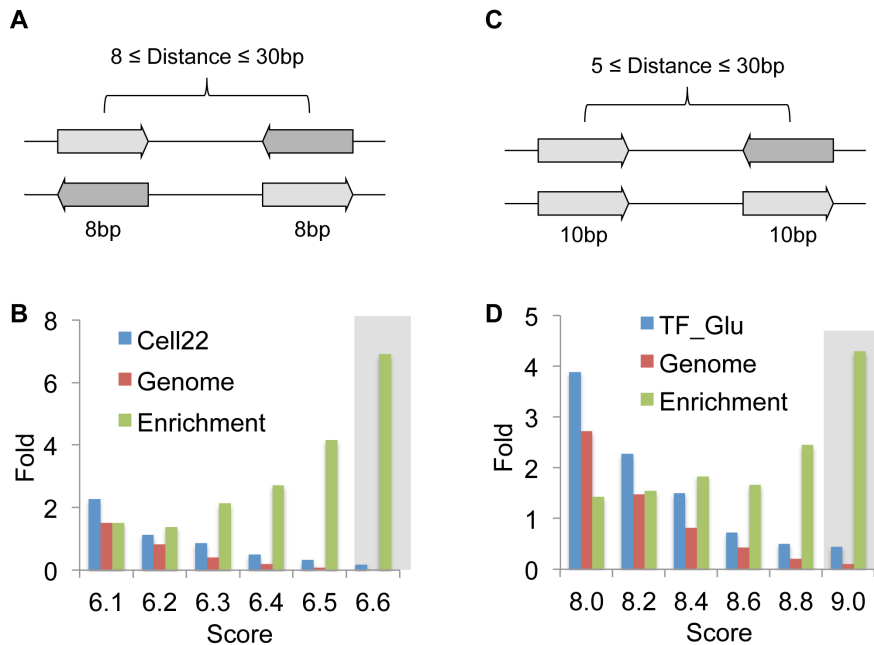

**Figure 4. Search for repeated XYR1 and CRE1 binding sites on different datasets.** **A)** In the XYR1, both inverted and everted sites were considered and only sites within a distance between 8 and 30 bp were taken. **B)** Representation of repeated binding sites at the cellulase promoters and at the genome scale. The y-axis (fold) represents the number of sites identified relative to the number of promoters from the datasets. The enrichment group represents the rate between sites per promoters from the cellulase promoters and the corresponding valued from the genome group. Grey shaded region highlight the score with higher enrichment. **C)** For the prediction of CRE1-binding sites, both inverted and direct repeats spaced between 5 to 30 bp were considered. **D)** Representation of sites per promoters and the enrichment at the glucose dataset vs. the genome, calculated as in **B**. doi:10.1371/journal.pone.0099366.g004



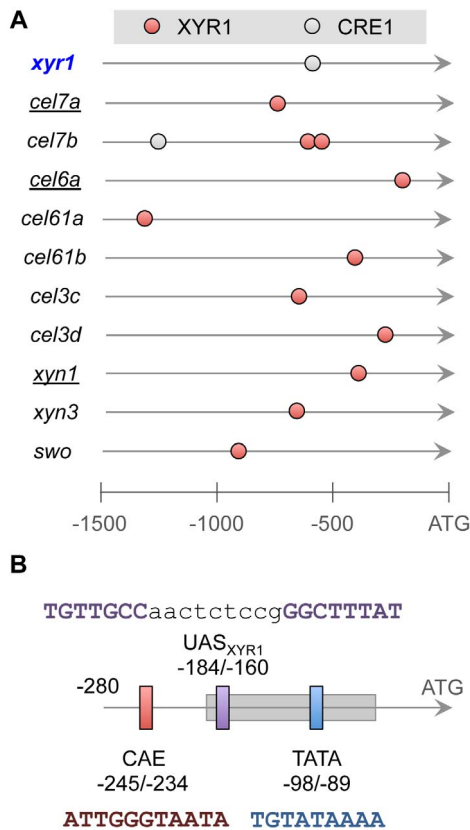

**Figure 5. Identification of XYR1 and CRE1-binding sites at target promoters.** **A)** Representation of the binding sites found at the promoters of 10 cellulase encoding-genes and at promoters of the *xyl1* gene. Each circle represent a binding site formed by repeats of the core sequences recognized by the two regulators. **B)** Zoom in at the promoter region of *cel6a* gene, showing the CAE (vertical red bar), the TATA-box (vertical blue bar), the nucleosome  $-1$  binding region (horizontal grey rectangle) and the nearly identified binding site for XYR1, labelled as  $UAS_{XYR1}$ . The DNA sequences of each regulatory element are shown [26]. Shown positions are relative to the start codon (ATG) of the *cel6a* gene.  
doi:10.1371/journal.pone.0099366.g005

experimental condition. The overall strategy used here is described schematically in **Fig. 1**. For motif discovery, we used MEME software [47] set to find short DNA segments (from 6 to 10 nt in length) that occurred zero or one time in each promoter. From the group of retrieved motifs (10 per dataset), we searched for those resembling the reported consensus for XYR1 (5'-GGCWWW-3', where W stands for "A" or "T") and CRE1 (5'-SYGGRG-3', where S is for "G" or "C", Y for "C" or "T" and R for "A" or "G") [11,41]. In the case of the genes from RNA-seq experiments related to cells grown on cellulose or sophorose, we found no motif that resembled either consensus sequence. However, in the case of the 22 cellulases genes dependent of XYR1 [46] we were able to identify two motifs (named Cell-M1 and Cell-M2, **Fig. 2A**) showing a highly conserved GGC core followed by an AT rich region [11]. Each of these motifs was present in all the 22-cellulase promoters analysed, and they mainly diverged in the bases that were conserved at the 3'-end of the sequences (**Fig. 2A**). Then, the DNA sequences of the Cell-M1 and Cell-M2 motifs were merged to generate consensus that potentially represents the binding site for XYR1 in *T. reesei* (**Fig. 2B**).

On the other hand, when the short DNA motifs discovered by MEME on the Glucose dataset were analysed, we again could find two motifs (Glu-M1 and Glu-M2) that resembled the reported consensus sequence for CRE1 (**Fig. 2C**). These motifs have a core GGAG sequence at positions 4 to 7 that matches the expected GGRG consensus. However, although position 3 was expected to be occupied by a T or a C base, the most frequent base found at this location was a T, followed by a G, which was the second most represented base nucleotide (**Fig. 2C**). The region formed by these 5 bases (from 3 to 7) was the most conserved over the motifs, as shown by the consensus generated by the joint of their sequences (**Fig. 2D**). The position 2, which was expected to be occupied by a G or a C, was less conserved compared to the core region but displayed a slight preference for A and T bases (**Fig. 2D**). Finally, since these motifs were only detected on the Glucose promoter dataset and due to their high homology with the consensus for CRE1 binding site, we suggest that the motif in **Fig. 2D** in fact represents the *cis*-regulatory element recognized by this protein in *T. reesei*. Taken together, XYR1 and CRE1 motifs (**Fig. 2B and 2D**) display the first high-resolution representation of the binding sites recognized by XYR1 and CRE1, respectively, in *T. reesei*, and are valuable tools to investigate their regulons in this organism.

### Determining the Architecture of *Cis*-regulatory Elements for XYR1 and CRE1

After identifying the putative binding consensus of XYR1 and CRE1 in *T. reesei*, we decided to decipher how these regulators recognize their target promoters. While several works have tried to understand this process at the global scale, a unified model for protein-DNA interaction for these regulators is still not available [6,38]. For instance, several reports support the notion that functional XYR1-binding sites have to be arranged in a specific way, such as inverted repeats [29,52]. Alternatively, Furukawa and colleagues (2009) suggested that XYR1 regulated promoters are endowed with a higher number of single DNA sequences matching the GGCWWW consensus than the background genome. In the same way, promoter recognition by CRE1 has been explained in terms of single sites or repeated sites (either inverted or direct) spaced shortly from one another [10,20,25,27,39]. Since the two motifs generated here (**Fig. 2B and 2D**) represents a higher resolution description of the binding sites for both regulators, we resolved to investigate the role of single and multi-sites for the regulation of target promoters in their respective datasets. Following first the assumption that single sites would be enough to direct the regulators to their targets, one would expect that regulated promoters would harbour binding sites with higher affinity than un-regulated ones [53]. Using the score obtained from the specific Position Weight Matrixes (PWMs) representing XYR1 and CRE1 binding consensus as indicative of the relative TF-binding affinity [54], we accessed the score of identified sites at the genome scale and on the specific datasets (i.e., the group of 22 cellulases for XYR1 sites and the group of TFs up-regulated under Glucose growth for CRE1). For this, we identified only the best hit per promoter according to the two PWMs.

As shown in **Fig. 3A**, the putative binding sites for XYR1 at the genome scale followed a normal-like distribution with scores ranging from  $\sim 6.2$  to 7.3 and a peak near 6.7. However, when the promoter of the 22 cellulase genes were analysed, we found a much arrowed distribution with two peaks, one close to 6.7 and the other around 7 (**Fig. 3B**). In fact, this analysis reveals that nearly half of the cellulase promoters are endowed with a site with score above 7, while a considerably lower portion of the entire genome presents sites above this score. In the case of CRE1, the same pattern was observed, since a large portion of the Glucose

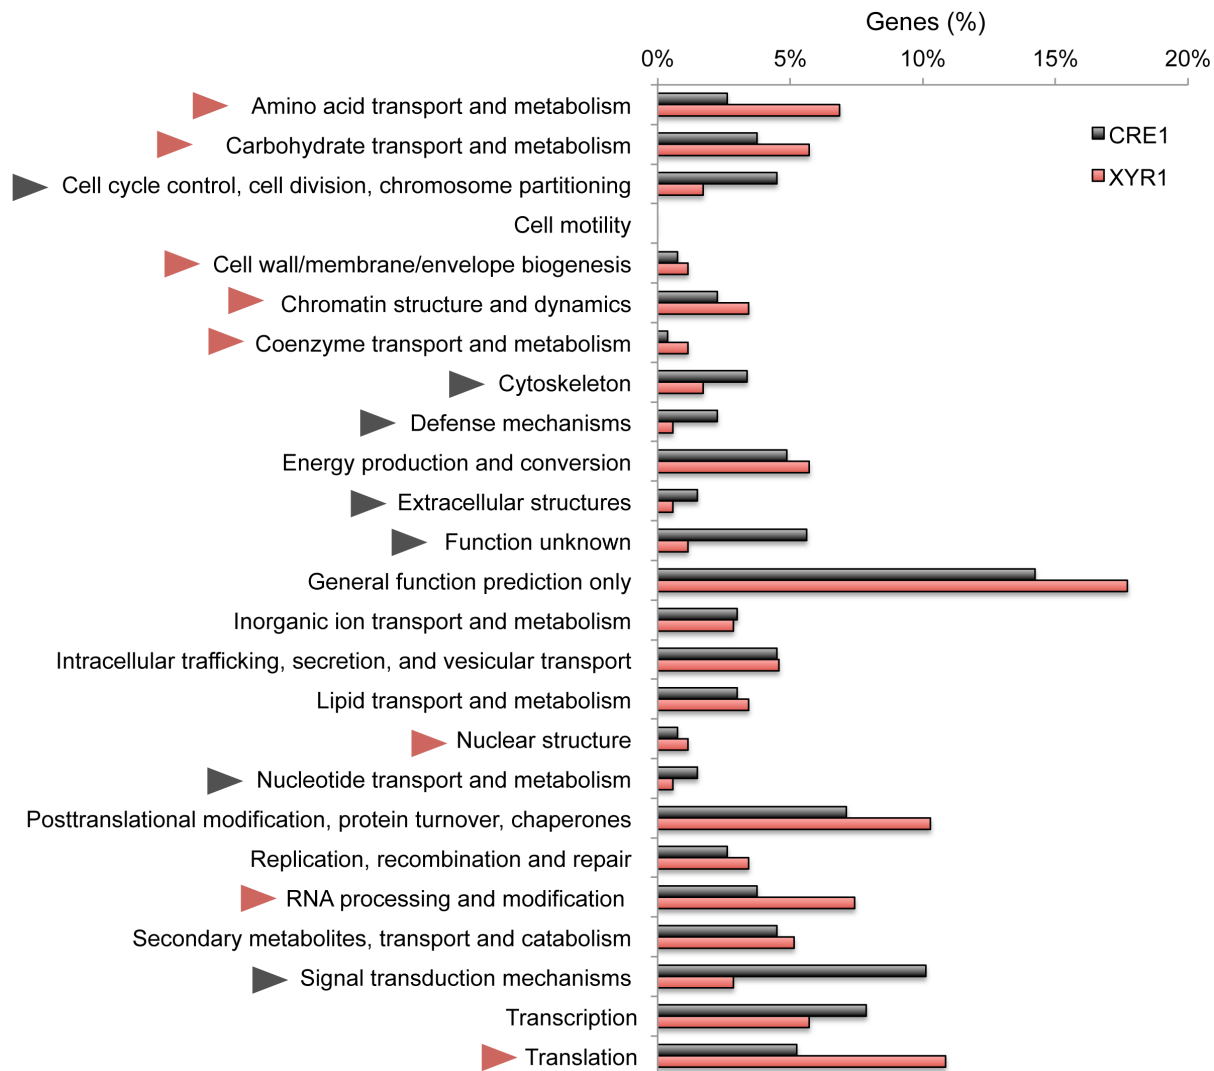

**Figure 6. Defining the categories of genes potentially regulated directly by XYR1 and CRE1.** Percentages of genes belonging to each functional category for both regulons are shown. Red triangles indicate functional categories enriched in the XYR1 regulon, while grey triangles point to those more abundant on the CRE1 regulon. doi:10.1371/journal.pone.0099366.g006

promoter dataset displayed binding sites with scores between 9.8 and 10, while sites in this range were less frequent at the genome scale (Fig. 3C–D). In this way, these data strengthen the notion that single, high-affinity sites could be used as good descriptors of promoters targeted by XYR1 and CRE1 [11]. Yet, since the high score sites were still very abundant at the genomic level, we decided to investigate binding sites arranged in specific architectures proposed previously [6,11,18,29,55]. In the case of XYR1 binding sites, we focused on both inverted and everted repeats located within in a distance of between 8 to 30 nt from each other (Fig. 4A). We then searched for sites that fulfilled this requirement and used different thresholds in terms of score of both sites (ranging from 6.1 to 6.6). As shown in Fig. 4B, as expected, increasing threshold values generated the identification of fewer sites per promoters at both the cellulase group and at the genome scale. However, at higher thresholds we observed an enrichment of sites at the cellulase promoters in comparison to genes of *T. reesei* genome (Fig. 4B). In fact, one of the promoters that passed the 6.6 threshold value is from the *Cel7a* gene, which encodes one of the most abundant cellulase genes produced by *T. reesei* [6]. For the

inspection of CRE1 binding sites, we searched for sites spaced within a distance of between 5 to 30 nt and both inverted and direct repeats were considered ([56]; Fig. 4C). As in the case of XYR1, the same tendency for enrichment of sites at the target promoters was observed, with an augmentation level of more than 4 when the score 9.0 was applied (Fig. 4D). These results show that searching for dual binding sites allowed a better definition of XYR1 and CRE1 targets. It is worth to notice that the disposition of the binding sites seemed to be more important than the PWM score itself, since thresholds near the average values of the genome distribution still provided a high enrichment in the target promoters (Fig. 4B and 4D). All together, the data provided here suggest that dual binding sites are more relevant for the recognition of the target promoters by XYR1 and CRE1 than single sites.

#### Inspection of Cellulase Promoters for XYR1 and CRE1 Binding Sites

Once we defined the relevant architecture of the *cis*-regulatory elements potentially recognized by XYR1 and CRE1, we decided

to search for the presence of these elements in the promoters of the cellulase-encoding genes. As discussed before, it is well known that cellulase-encoding genes are controlled at the transcriptional level by induction in the presence of the substrates (such as cellulose and sophorose) and repression mediated by a preferred carbon source such as glucose [6,38]. Whereas the participation of XYR1 and CRE1 regulators have been characterized for the induction and repression of cellulase promoters, respectively, remains an open question about which promoters are directly recognized by these proteins and which ones are regulated through indirect mechanisms involving yet unknown TFs [6,38]. Up to now, *in vivo* and *in vitro* evidence for direct interaction between XYR1 and CRE1 have been reported for promoters such as *cel7a* [18,19], *xyn1* [13,19,29] and proposed for *cel6a* [26,40,57]. In this way, we proceeded to the identification of potential XYR1 and CRE1 binding sites on 22 cellulase promoters using the architectures defined in the previous section, and we contrasted results with the information available in literature for the three characterized promoters. In addition, we inspected the promoter region of the *xyr1* gene, since CRE1 has been reported to affect its expression [17,58]. As represented in **Fig. 5A**, using a threshold value of 6.4 for XYR1 binding sites, we were able to identify dual elements in 10 cellulase promoters. While most of the promoters presented a single dual site, the *cel7b* promoter displayed two sites that were shortly spaced and located about 600 bp upstream of the gene start codon (**Fig. 5A**). In addition, most of the identified promoters (9 out of 10) presented a putative XYR1 binding site located less than 1 kb from the ATG codon. Another interesting finding was that the promoters of three (*Cel7a*, *Cel6a*, *Cel7b*) of the four most efficient cellulolytic enzymes produced by *T. reesei* presented a putative dual XYR1 binding site as detected using the searching approach presented here.

Comparison of the binding sites found *in silico* with those previously characterized at some cellulase promoters showed a remarkable level of agreement. First, in the case of the *xyn1* promoter, a GGCTAA-box formed by two inverted repeats of the GGCWW element and located around position  $-410$  was shown to be required for XYR1 interaction *in vivo* and *in vitro* [29]. Using the searching methodology described here, the same sequence was identified as the putative XYR1 binding site (**Fig. 5A**). In the case of the *cel7a* promoter, two potential single binding sites for XYR1 have been proposed as functional at positions  $-320$  and  $-733$ , but no direct evidence for their role was provided yet [25]. Our *in silico* analysis of the *cel7a* promoter revealed a high-score direct repeat site that includes at its 3' region the  $-733$  site previously reported. Finally, the case of the *cel6a* promoter represents a more interesting example. Previous analysis have revealed the existence of a region named CAE (for *cbh2* activating element) between positions  $-234$  and  $-245$  that is essential for the induction of this promoter in response to the presence of cellulose and sophorose [51], and this region was found to be regulated by the HAP2/3/5 complex and a yet uncharacterized protein [26]. By studying the nucleosome occupancy of the *cel6a* promoter, Zeilinger and colleagues (2003) found that the CAE is located in a nucleosome-free region and that proteins binding to this element controls the assemble of a nucleosome (named nucleosome  $-1$ ) covering a region from  $-192$  to  $-49$  that includes the TATA-box [26]. These authors proposed an induction model where the removal of the nucleosome  $-1$  is necessary to allow the interaction of proteins with TATA-box to allow the induction of the *cel6a* promoter in response to cellulose and sophorose. However, the target sequence of the XYR1 regulator at this promoter has not yet been identified, although the available data suggest that it would bind somewhere downstream

the CAE region [26,51]. The search for XYR1 binding sites used here allowed the identification of an everted repeat at the *cel6a* promoter at the position  $-160$  to  $-184$ , which agrees perfectly with the current available information on the regulation of this promoter. It is worth to notice that everted binding sites are recognized by other zinc finger proteins [56], but XYR1 has not been associated with these elements so far. **Fig. 5B** summarizes the putative *cel6a* promoter architecture, including the nearly identified potential XYR1 binding site (named UAS<sub>XYR1</sub>) and the *cis*-regulatory elements characterized previously [26,51].

When CRE1 binding sites were investigated in the cellulase dataset, only the *cel7a* promoter revealed an element that passed the stringent used criteria (**Fig. 5A**). However, most of the CRE1 binding sites proposed or demonstrated in literature have a poly-G at the "GGRG" part of the consensus sequence, while the PWM<sub>CRE1</sub> identified here has a clear preference for the GGAG sequence (**Fig. 2D**). Yet, direct interaction between CRE1 and target promoters has been demonstrated for *cel7a* promoter but not for *cel6a* [26], clearly suggesting that CCR mediated by CRE1 on cellulase genes should be exerted through indirect mechanisms. In this sense, the clear candidate to be the mediator of CRE1 regulation is XYR1 itself, which has been reported as affected by CRE1 [17,58]. In fact, *xyr1* was found to be the top one up-regulated gene under growth on glucose in a strain of *T. reesei* lacking a functional CRE1 protein (Antonieto *et al.* 2014, manuscript in preparation). Quite surprisingly, the searching for CRE1 binding sites at the *xyr1* promoter retrieved just a *cis*-regulatory element (**Fig. 5A**), contrasting the previous prediction of 10 single sites found using the degenerated consensus for this regulator [58]. Taken together, these analyses suggest that the binding sites identified here represent high confidence binding sites for XYR1 and CRE1 in *T. reesei*.

## Genome-wide Identification of Potential XYR1 and CRE1 Targets

Once we defined the *cis*-regulatory architectures potentially recognized by XYR1 and CRE1, we performed a genome-wide inspection of potential target promoters for both regulators. For this, a list of 9,115 promoters relative to the annotated genes of *T. reesei* were analysed using the search criteria described in **Fig. 4**. Using a stringent threshold of 6.6 and 9.2 for XYR1 and CRE1 binding sites, respectively, we identified 233 genes potentially regulated by the former (**Table S4**) and 310 candidates for the latter (**Table S5**). Next, we classified the identified genes according to their functional categories (KOG), and then we compared the regulons to identify the difference in the functional scope of both regulators. As shown in **Fig. 6**, the potential XYR1 regulon is enriched mainly with genes related to the metabolization of carbohydrates and amino acids, chromatin structure and dynamics, RNA processing and modification and translation, among others. On the other hand, the putative CRE1 regulon showed a strong augmentation for genes related to signal transduction mechanisms and genes with unknown functions, cytoskeleton, cell cycle control and signal transduction mechanisms. While this analysis provided some clues about the potential targets of XYR1 and CRE1, it should be notice that it does not provide a full description of their regulons since additional TFs could mediate indirect regulation at target promoters [6,59]. In this way, a better understanding of the functional scope of these proteins requires the integration of *in vivo* expression data, as is described below.

## Defining the Direct Role of XYR1 and CRE1 under Different Growth Conditions

In order to get an insight into the functioning of the regulon of XYR1 and CRE1 in *T. reesei*, we carried out a search for binding sites of these proteins in 6 sets of genes differentially regulated under different growth conditions. For this, we searched for XYR1 sites in the promoters of genes up and down regulated under growth in the presence of cellulose and sophorose in a strain of *T. reesei* lacking the functional *xyr1* gene, as determined through RNA-seq experiments (Castro *et al.*, manuscript in preparation). In the same way, we surveyed CRE1 sites in promoters of genes up and down regulated during growth on glucose in a strain lacking the *cre1* gene (Antonieto *et al.*, manuscript in preparation). Using these datasets, we found that between 13.6 and 15.8% of the genes differentially regulated in the wild type and *xyr1* minus strain presented a putative XYR1 binding site. In the case of the *cre1* mutant experiments, between 8.9 and 13.9% of the promoters were endowed with a putative binding site for CRE1. The list of genes identified using this analysis along with their expression values determined using RNA-seq is provided in the Supporting Information (**Tables S6-S11**). Taken together, these data strongly indicated that indirect regulation plays an important role on control of target genes by XYR1 and CRE1 proteins in *T. reesei*.

## Conclusions

The data provide here addressed for the first time the quantitative identification of binding sites for XYR1 and CRE1 proteins, two general regulators that coordinate the expression of cellulase-encoding genes in *T. reesei* [10,11,58]. The main advantage of the approach used here was the utilization of sets of co-regulated genes to allow the unsupervised discovery of DNA motifs potentially related to the binding of TFs acting at the target group of genes. This analysis allowed us to define PWMs for XYR1 and CRE1 that are specific to *T. reesei*, eluding the bias generated by using consensus sequences determined in other organisms [41]. With these tools on hand, we could observe that while single sites worked generally well as descriptors of XYR1- and CRE1-regulated genes, repeated motifs shortly spaced and with different arrangements seemed to be more associated with promoters targeted by these regulators [42]. So, why some promoters would be endowed with high-score single sites while others presented repeated sites? In the face of the results presented here and those from the general model for cellulase induction currently available [6,38], we propose a mechanistic model for XYR1 binding that could explain the presence of single or dual sites on cellulase promoters. The current proposed induction mechanism suggests that under a repression condition (i.e., in the presence of glucose) the production of cellulases is completely blocked, while under starvation conditions basal levels of these enzymes (mainly Cel7a and Cel6a) are produced. Subsequently, when the fungus finds cellulose, the produced enzymes act on this insoluble substrate to generate soluble inducers such as sophorose, which in turn would trigger the signal for high level of cellulase production [60,61]. In our model, since we observed high-confidence dual binding sites on the *cel7a* and *cel6a* promoters as well as a strong CRE1 site in the *xyr1* regulatory region (**Fig. 5A**), starvation conditions would increase the levels of the XYR1 protein through the release of CCR mediated by CRE1 on its promoter. Next, increasing XYR1 levels would allow the formation of homodimers that would preferentially activate promoters endowed with *cis*-regulatory elements arranged as repeats, such as those for Cel7a and Cel6a. This would account for an increase in the basal expression of these proteins [60,61]. Therefore, when these enzymes convert cellulose into the inducers

such as sophorose, additional TFs able to sense this molecule would act in synergy with XYR1, perhaps through the formation of heterodimers, to activate cellulase promoters formed by single or repeated sites, allowing thus the production of high levels of cellulases [6,13]. Candidates for such promoter specific regulation include the nearly characterized BglR that regulates some  $\beta$ -glucosidase genes [16]. Evidently, new experimental approaches are required to get further insights into the mechanisms of signal integration present in the cellulase promoters in *T. reesei*, and we believe that the work reported here will contribute significantly for this task.

## Supporting Information

### **Tables S1 Dataset of TFs up regulated in cellulose growth condition.**

(PDF)

### **Tables S2 Dataset of TFs up regulated in sophorose growth condition.**

(PDF)

### **Tables S3 Dataset of TFs up regulated in glucose growth condition.**

(PDF)

### **Tables S4 Genome-wide prediction of XYR1 binding sites in *T. reesei*.**

(PDF)

### **Tables S5 Genome-wide prediction of CRE1 binding sites in *T. reesei*.**

(PDF)

### **Tables S6 Prediction of XYR1 binding sites on genes down regulated in a $\Delta xyr1$ mutant induced with cellulose.**

(PDF)

### **Tables S7 Prediction of XYR1 binding sites on genes up regulated in a $\Delta xyr1$ mutant induced with cellulose.**

(PDF)

### **Tables S8 Prediction of XYR1 binding sites on genes down regulated in a $\Delta xyr1$ mutant induced with sophorose.**

(PDF)

### **Tables S9 Prediction of XYR1 binding sites on genes up regulated in a $\Delta xyr1$ mutant induced with sophorose.**

(PDF)

### **Tables S10 Prediction of CRE1 binding sites on genes down regulated in a $\Delta cre1$ mutant induced with sophorose.**

(PDF)

### **Tables S11 Prediction of CRE1 binding sites on genes up regulated in a $\Delta cre1$ mutant induced with sophorose.**

(PDF)

## Acknowledgments

We are thankful to lab colleagues for insightful discussion and assistance.

## Author Contributions

Conceived and designed the experiments: RSR RNS. Performed the experiments: RSR LSC ACCA GFP. Analyzed the data: RSR MEG. Wrote the paper: RSR RNS.



## References

- Tomme P, Van Tilbeurgh H, Pettersson G, Van Damme J, Vandekerckhove J, et al. (1988) Studies of the cellulolytic system of *Trichoderma reesei* QM 9414. Analysis of domain function in two cellobiohydrolases by limited proteolysis. *European journal of biochemistry/FEBS* 170: 575–581.
- Sternberg D, Mandels GR (1979) Induction of cellulolytic enzymes in *Trichoderma reesei* by sophorose. *Journal of bacteriology* 139: 761–769.
- Minty JJ, Singer ME, Scholz SA, Bae CH, Ahn JH, et al. (2013) Design and characterization of synthetic fungal-bacterial consortia for direct production of isobutanol from cellulosic biomass. *Proceedings of the National Academy of Sciences of the United States of America* 110: 14592–14597.
- Maurya DP, Singh D, Pratap D, Maurya JP (2012) Optimization of solid state fermentation conditions for the production of cellulase by *Trichoderma reesei*. *Journal of environmental biology/Academy of Environmental Biology, India* 33: 5–8.
- Schuster A, Schmoll M (2010) Biology and biotechnology of *Trichoderma*. *Applied microbiology and biotechnology* 87: 787–799.
- Amore A, Giacobbe S, Faraco V (2013) Regulation of cellulase and hemicellulase gene expression in fungi. *Current genomics* 14: 230–249.
- Adav SS, Chao LT, Sze SK (2012) Quantitative secretomic analysis of *Trichoderma reesei* strains reveals enzymatic composition for lignocellulosic biomass degradation. *Molecular & cellular proteomics : MCP* 11: M111 012419.
- Stricker AR, Mach RL, de Graaff LH (2008) Regulation of transcription of cellulases- and hemicellulases-encoding genes in *Aspergillus niger* and *Hypocrea jecorina* (*Trichoderma reesei*). *Applied microbiology and biotechnology* 78: 211–220.
- Ouyang J, Yan M, Kong D, Xu L (2006) A complete protein pattern of cellulase and hemicellulase genes in the filamentous fungus *Trichoderma reesei*. *Biotechnology journal* 1: 1266–1274.
- Portnoy T, Margeot A, Linke R, Atanasova L, Fekete E, et al. (2011) The CRE1 carbon catabolite repressor of the fungus *Trichoderma reesei*: a master regulator of carbon assimilation. *BMC genomics* 12: 269.
- Furukawa T, Shida Y, Kitagami N, Mori K, Kato M, et al. (2009) Identification of specific binding sites for XYR1, a transcriptional activator of cellulolytic and xylanolytic genes in *Trichoderma reesei*. *Fungal genetics and biology : FG & B* 46: 564–574.
- Wang S, Liu G, Wang J, Yu J, Huang B, et al. (2013) Enhancing cellulase production in *Trichoderma reesei* RUT C30 through combined manipulation of activating and repressing genes. *Journal of industrial microbiology & biotechnology* 40: 633–641.
- Herold S, Bischof R, Metz B, Seiboth B, Kubicek CP (2013) Xylanase gene transcription in *Trichoderma reesei* is triggered by different inducers representing different hemicellulosic pentose polymers. *Eukaryotic cell* 12: 390–398.
- Gyalai-Korpos M, Nagy G, Mareczky Z, Schuster A, Reczey K, et al. (2010) Relevance of the light signaling machinery for cellulase expression in *Trichoderma reesei* (*Hypocrea jecorina*). *BMC research notes* 3: 330.
- Seiboth B, Karimi RA, Phatale PA, Linke R, Hartl L, et al. (2012) The putative protein methyltransferase LAE1 controls cellulase gene expression in *Trichoderma reesei*. *Molecular microbiology* 84: 1150–1164.
- Nitta M, Furukawa T, Shida Y, Mori K, Kuhara S, et al. (2012) A new Zn(II)/Cys(6)-type transcription factor BglR regulates beta-glucosidase expression in *Trichoderma reesei*. *Fungal genetics and biology : FG & B* 49: 388–397.
- Portnoy T, Margeot A, Seidl-Seiboth V, Le Crom S, Ben Chaabane F, et al. (2011) Differential regulation of the cellulase transcription factors XYR1, ACE2, and ACE1 in *Trichoderma reesei* strains producing high and low levels of cellulase. *Eukaryotic cell* 10: 262–271.
- Ling M, Qin Y, Li N, Liang Z (2009) Binding of two transcriptional factors, Xyr1 and ACE1, in the promoter region of cellulase cbh1 gene. *Biotechnology letters* 31: 227–231.
- Stricker AR, Grosstessner-Hain K, Wurleitner E, Mach RL (2006) Xyr1 (xylanase regulator 1) regulates both the hydrolytic enzyme system and D-xylose metabolism in *Hypocrea jecorina*. *Eukaryotic cell* 5: 2128–2137.
- Ilmen M, Thrane C, Penttila M (1996) The glucose repressor gene cre1 of *Trichoderma*: isolation and expression of a full-length and a truncated mutant form. *Molecular & general genetics : MGG* 251: 451–460.
- Clapier CR, Cairns BR (2009) The biology of chromatin remodeling complexes. *Annual review of biochemistry* 78: 273–304.
- Berger SL (2007) The complex language of chromatin regulation during transcription. *Nature* 447: 407–412.
- Narlikar GJ, Fan HY, Kingston RE (2002) Cooperation between complexes that regulate chromatin structure and transcription. *Cell* 108: 475–487.
- Struhl K (1999) Fundamentally different logic of gene regulation in eukaryotes and prokaryotes. *Cell* 98: 1–4.
- Ries L, Belshaw NJ, Ilmen M, Penttila ME, Alapuranen M, et al. (2014) The role of CRE1 in nucleosome positioning within the cbh1 promoter and coding regions of *Trichoderma reesei*. *Applied microbiology and biotechnology* 98: 749–762.
- Zeilinger S, Schmoll M, Pail M, Mach RL, Kubicek CP (2003) Nucleosome transactions on the *Hypocrea jecorina* (*Trichoderma reesei*) cellulase promoter cbh2 associated with cellulase induction. *Molecular genetics and genomics : MGG* 270: 46–55.
- Mach RL, Strauss J, Zeilinger S, Schindler M, Kubicek CP (1996) Carbon catabolite repression of xylanase I (xyn1) gene expression in *Trichoderma reesei*. *Molecular microbiology* 21: 1273–1281.
- Messner R, Kubicek CP (1991) Carbon Source Control of Cellobiohydrolase I and II Formation by *Trichoderma reesei*. *Applied and environmental microbiology* 57: 630–635.
- Rauscher R, Wurleitner E, Wacenovsky C, Aro N, Stricker AR, et al. (2006) Transcriptional regulation of xyn1, encoding xylanase I, in *Hypocrea jecorina*. *Eukaryotic cell* 5: 447–456.
- Sun J, Tian C, Diamond S, Glass NL (2012) Deciphering transcriptional regulatory mechanisms associated with hemicellulose degradation in *Neurospora crassa*. *Eukaryotic cell* 11: 482–493.
- van Peij NN, Visser J, de Graaff LH (1998) Isolation and analysis of xlnR, encoding a transcriptional activator co-ordinating xylanolytic expression in *Aspergillus niger*. *Molecular microbiology* 27: 131–142.
- Aro N, Ilmen M, Saloheimo A, Penttila M (2003) ACEI of *Trichoderma reesei* is a repressor of cellulase and xylanase expression. *Applied and environmental microbiology* 69: 56–65.
- Saloheimo A, Aro N, Ilmen M, Penttila M (2000) Isolation of the ace1 gene encoding a Cys(2)-His(2) transcription factor involved in regulation of activity of the cellulase promoter cbh1 of *Trichoderma reesei*. *The Journal of biological chemistry* 275: 5817–5825.
- Klein CJ, Olsson L, Nielsen J (1998) Glucose control in *Saccharomyces cerevisiae*: the role of Mig1 in metabolic functions. *Microbiology* 144 (Pt 1): 13–24.
- Ogasawara W, Shida Y, Furukawa T, Shimada R, Nakagawa S, et al. (2006) Cloning, functional expression and promoter analysis of xylanase III gene from *Trichoderma reesei*. *Applied microbiology and biotechnology* 72: 995–1003.
- Wurleitner E, Pera L, Wacenovsky C, Cziferszky A, Zeilinger S, et al. (2003) Transcriptional regulation of xyn2 in *Hypocrea jecorina*. *Eukaryotic cell* 2: 150–158.
- Aro N, Saloheimo A, Ilmen M, Penttila M (2001) ACEII, a novel transcriptional activator involved in regulation of cellulase and xylanase genes of *Trichoderma reesei*. *The Journal of biological chemistry* 276: 24309–24314.
- Glass NL, Schmoll M, Cate JH, Coradetti S (2013) Plant cell wall deconstruction by ascomycete fungi. *Annual review of microbiology* 67: 477–498.
- Takashima S, Iikura H, Nakamura A, Masaki H, Uozumi T (1996) Analysis of Cre1 binding sites in the *Trichoderma reesei* cbh1 upstream region. *FEMS microbiology letters* 145: 361–366.
- Gorsche R, Jovanovic B, Gudynaite-Savitch L, Mach RL, Mach-Aigner AR (2014) A highly sensitive in vivo footprinting technique for condition-dependent identification of cis elements. *Nucleic acids research* 42: e1.
- Cubero B, Scaccocchio C (1994) Two different, adjacent and divergent zinc finger binding sites are necessary for CREA-mediated carbon catabolite repression in the proline gene cluster of *Aspergillus nidulans*. *The EMBO journal* 13: 407–415.
- Rahman Z, Shida Y, Furukawa T, Suzuki Y, Okada H, et al. (2009) Evaluation and characterization of *Trichoderma reesei* cellulase and xylanase promoters. *Applied microbiology and biotechnology* 82: 899–908.
- Mach RL, Zeilinger S (2003) Regulation of gene expression in industrial fungi: *Trichoderma*. *Applied microbiology and biotechnology* 60: 515–522.
- Lockington RA, Rodbourn L, Barnett S, Carter CJ, Kelly JM (2002) Regulation by carbon and nitrogen sources of a family of cellulases in *Aspergillus nidulans*. *Fungal genetics and biology : FG & B* 37: 190–196.
- Dos Santos Castro L, Pedersoli WR, Antonieto AC, Steindorff AS, Silva-Rocha R, et al. (2014) Comparative metabolism of cellulose, sophorose and glucose in *Trichoderma reesei* using high-throughput genomic and proteomic analyses. *Biotechnology for biofuels* 7: 41.
- Castro LD, Antonieto AC, Pedersoli WR, Rocha RS, Persinoti GF, et al. (2014) Expression pattern of cellulolytic and xylanolytic genes regulated by transcriptional factors XYR1 and CRE1 are affected by carbon source in *Trichoderma reesei*. *Gene expression patterns : GEP*.
- Bailey TL, Williams N, Misleh C, Li WW (2006) MEME: discovering and analyzing DNA and protein sequence motifs. *Nucleic acids research* 34: W369–373.
- Schneider TD, Stephens RM (1990) Sequence logos: a new way to display consensus sequences. *Nucleic acids research* 18: 6097–6100.
- Martinez D, Berka RM, Henriessat B, Saloheimo M, Arvas M, et al. (2008) Genome sequencing and analysis of the biomass-degrading fungus *Trichoderma reesei* (syn. *Hypocrea jecorina*). *Nature biotechnology* 26: 553–560.
- Murray PG, Collins CM, Grassick A, Tuohy MG (2003) Molecular cloning, transcriptional, and expression analysis of the first cellulase gene (cbh2), encoding cellobiohydrolase II, from the moderately thermophilic fungus *Talaromyces emersonii* and structure prediction of the gene product. *Biochemistry and biophysical research communications* 301: 280–286.
- Zeilinger S, Mach RL, Kubicek CP (1998) Two adjacent protein binding motifs in the cbh2 (cellobiohydrolase II-encoding) promoter of the fungus *Hypocrea jecorina* (*Trichoderma reesei*) cooperate in the induction by cellulose. *The Journal of biological chemistry* 273: 34463–34471.
- Furukawa T, Shida Y, Kitagami N, Ota Y, Adachi M, et al. (2008) Identification of the cis-acting elements involved in regulation of xylanase III gene expression

- in *Trichoderma reesei* PC-3-7. *Fungal genetics and biology* : FG & B 45: 1094–1102.
53. Wasserman WW, Sandelin A (2004) Applied bioinformatics for the identification of regulatory elements. *Nature reviews Genetics* 5: 276–287.
  54. Hallikas O, Palin K, Sinjushina N, Rautiainen R, Partanen J, et al. (2006) Genome-wide prediction of mammalian enhancers based on analysis of transcription-factor binding affinity. *Cell* 124: 47–59.
  55. Shida Y, Furukawa T, Ogasawara W, Kato M, Kobayashi T, et al. (2008) Functional analysis of the *egl3* upstream region in filamentous fungus *Trichoderma reesei*. *Applied microbiology and biotechnology* 78: 515–524.
  56. MacPherson S, Larochelle M, Turcotte B (2006) A fungal family of transcriptional regulators: the zinc cluster proteins. *Microbiology and molecular biology reviews* : MMBR 70: 583–604.
  57. Stangl H, Gruber F, Kubicek CP (1993) Characterization of the *Trichoderma reesei* *cbh2* promoter. *Current genetics* 23: 115–122.
  58. Mach-Aigner AR, Pucher ME, Steiger MG, Bauer GE, Preis SJ, et al. (2008) Transcriptional regulation of *xyl1*, encoding the main regulator of the xylanolytic and cellulolytic enzyme system in *Hypocrea jecorina*. *Applied and environmental microbiology* 74: 6554–6562.
  59. Guelzim N, Bottani S, Bourgine P, Kepes F (2002) Topological and causal structure of the yeast transcriptional regulatory network. *Nature genetics* 31: 60–63.
  60. Carle-Urioste JC, Escobar-Vera J, El-Gogary S, Henrique-Silva F, Torigoi E, et al. (1997) Cellulase induction in *Trichoderma reesei* by cellulose requires its own basal expression. *The Journal of biological chemistry* 272: 10169–10174.
  61. el-Gogary S, Leite A, Crivellaro O, Eveleigh DE, el-Dorry H (1989) Mechanism by which cellulose triggers cellobiohydrolase I gene expression in *Trichoderma reesei*. *Proceedings of the National Academy of Sciences of the United States of America* 86: 6138–6141.
