# Supplementary material for: Deciphering the Cis-Regulatory Elements for XYR1 and CRE1 Regulators in Trichoderma reesei
Source: PubMed Central journal article supplement (PMC4062390; doi:10.1371/journal.pone.0099366), 2014-06-18
Supplement: pone.0099366.s001.pdf [file pone.0099366.s001.pdf]

**Tables S1.** Dataset of TFs up regulated in cellulose growth condition.

| <b>Protein ID</b> | <b>Description</b>                |
|-------------------|-----------------------------------|
| 110152            | BZIP transcriptional regulator    |
| 120698            | C2H2 transcriptional regulator    |
| 108775            | Transcription factor AbaA         |
| 68254             | Zn2Cys6 transcriptional regulator |
| 69972             | Zn2Cys6 transcriptional regulator |
| 121164            | Zn2Cys6 transcriptional regulator |
| 105269            | Zn2Cys6 transcriptional regulator |
