# Supplementary material for: Deciphering the Cis-Regulatory Elements for XYR1 and CRE1 Regulators in Trichoderma reesei
Source: PubMed Central journal article supplement (PMC4062390; doi:10.1371/journal.pone.0099366), 2014-06-18
Supplement: pone.0099366.s002.pdf [file pone.0099366.s002.pdf]

**Tables S2.** Dataset of TFs up regulated in sophorose growth condition.

| <b>Protein ID</b> | <b>Description</b>                |
|-------------------|-----------------------------------|
| 73654             | BZIP transcriptional regulator    |
| 67418             | C2H2 transcription factor         |
| 120224            | C2H2 transcriptional regulator    |
| 120428            | C2H2 transcriptional regulator    |
| 120908            | myb transcriptional regulator     |
| 80200             | transcription factor (Snd1/p100)  |
| 62244             | Zn2Cys6 transcriptional regulator |
| 65746             | Zn2Cys6 transcriptional regulator |
| 66828             | Zn2Cys6 transcriptional regulator |
| 68455             | Zn2Cys6 transcriptional regulator |
| 55274             | Zn2Cys6 transcriptional regulator |
| 70351             | Zn2Cys6 transcriptional regulator |
| 58389             | Zn2Cys6 transcriptional regulator |
| 21997             | Zn2Cys6 transcriptional regulator |
| 123881            | Zn2Cys6 transcriptional regulator |
| 121107            | Zn2Cys6 transcriptional regulator |
| 73792             | Zn2Cys6 transcriptional regulator |
| 72611             | Zn2Cys6 transcriptional regulator |
