# Supplementary material for: Deciphering the Cis-Regulatory Elements for XYR1 and CRE1 Regulators in Trichoderma reesei
Source: PubMed Central journal article supplement (PMC4062390; doi:10.1371/journal.pone.0099366), 2014-06-18
Supplement: pone.0099366.s003.pdf [file pone.0099366.s003.pdf]

**Tables S3.** Dataset of TFs up regulated in glucose growth condition.

| <b>Protein ID</b> | <b>Description</b>                                                                                |
|-------------------|---------------------------------------------------------------------------------------------------|
| 119759            | BZIP transcriptional regulator                                                                    |
| 21270             | CAP20 virulence factor                                                                            |
| 78049             | Elongation factor Tu (G)                                                                          |
| 75472             | Transcriptional regulator. unknown                                                                |
| 74346             | Translation elongation factor precursor from <i>Aspergillus fumigatus</i>                         |
| 57676             | Translation initiation factor 3. subunit i (elf-3i)                                               |
| 74252             | Translation initiation factor 6 (eIF6) by homologyToThe corresponding protein in other eukaryotes |
| 54437             | Zn2Cys6 transcriptional regulator                                                                 |
| 66047             | Zn2Cys6 transcriptional regulator                                                                 |
| 55759             | Zn2Cys6 transcriptional regulator                                                                 |
| 57534             | Zn2Cys6 transcriptional regulator                                                                 |
| 102497            | Zn2Cys6 transcriptional regulator                                                                 |
| 102499            | Zn2Cys6 transcriptional regulator                                                                 |
| 109394            | Zn2Cys6 transcriptional regulator                                                                 |
| 104182            | Zn2Cys6 transcriptional regulator                                                                 |
| 112202            | Zn2Cys6 transcriptional regulator                                                                 |
| 112499            | Zn2Cys6 transcriptional regulator                                                                 |
| 105520            | Zn2Cys6 transcriptional regulator                                                                 |
