# Supplementary material for: Deciphering the Cis-Regulatory Elements for XYR1 and CRE1 Regulators in Trichoderma reesei
Source: PubMed Central journal article supplement (PMC4062390; doi:10.1371/journal.pone.0099366), 2014-06-18
Supplement: pone.0099366.s004.pdf [file pone.0099366.s004.pdf]

**Tables S4.** Genome-wide prediction of XYR1 binding sites in *T. reesei*.

| Protein ID | Site 1* | Site 2 | Distance | Description                                                                  | Functional category                                                                             |
|------------|---------|--------|----------|------------------------------------------------------------------------------|-------------------------------------------------------------------------------------------------|
| 53947      | -1259   | -1248  | 11       | SWI-SNF chromatin-remodeling complex protein                                 | Chromatin structure and dynamics                                                                |
| 53302      | -144    | -133   | 11       | Glycolate oxidase                                                            | Energy production and conversion                                                                |
| 73689      | -985    | -964   | 21       | FOG: Zn-finger                                                               | General function prediction only                                                                |
| 53576      | -228    | -220   | 8        | CREB binding protein/P300 and related TAZ Zn-finger proteins                 | Transcription                                                                                   |
| 54450      | -634    | -611   | 23       | mRNA capping enzyme, guanylyltransferase (alpha) subunit                     | RNA processing and modification                                                                 |
| 119800     | -1179   | -1164  | 15       | Cell division control protein/predicted DNA repair exonuclease               | Replication, recombination and repair                                                           |
| 74258      | -1477   | -1451  | 26       | Phenylalanyl-tRNA synthetase beta subunit                                    | Translation, ribosomal structure and biogenesis                                                 |
| 103113     | -1156   | -1140  | 16       | Predicted short chain-type dehydrogenase                                     | General function prediction only                                                                |
| 53601      | -637    | -622   | 15       | Synaptobrevin/VAMP-like protein                                              | Intracellular trafficking, secretion, and vesicular transport                                   |
| 62362      | -1019   | -989   | 30       | Calcium transporting ATPase                                                  | Inorganic ion transport and metabolism                                                          |
| 108012     | -524    | -511   | 13       | Prolylcarboxypeptidase (angiotensinase C)                                    | Posttranslational modification, protein turnover, chaperones / General function prediction only |
| 71559      | -672    | -645   | 27       | Translation initiation factor 5A (eIF-5A)                                    | Translation, ribosomal structure and biogenesis                                                 |
| 78560      | -424    | -416   | 8        | Predicted GTPase                                                             | General function prediction only                                                                |
| 108087     | -1131   | -1119  | 12       | Nuclear receptor coregulator SMRT/SMRTER, contains Myb-like domains          | Transcription                                                                                   |
| 48951      | -993    | -978   | 15       | Protein involved in vacuolar polyphosphate accumulation, contains SPX domain | Inorganic ion transport and metabolism                                                          |
| 78753      | -251    | -223   | 28       | Cullins                                                                      | Cell cycle control, cell division, chromosome partitioning                                      |
| 78939      | -911    | -891   | 20       | RNA helicase BRR2, DEAD-box superfamily                                      | RNA processing and modification                                                                 |
| 71689      | -142    | -127   | 15       | Serine O-acetyltransferase                                                   | Amino acid transport and metabolism                                                             |
| 4479       | -978    | -970   | 8        | Small nuclear ribonucleoprotein (snRNP) Sm core protein                      | RNA processing and modification                                                                 |
| 49696      | -207    | -196   | 11       | Molecular chaperone (DnaJ superfamily)                                       | Posttranslational modification, protein turnover, chaperones                                    |
| 122657     | -1199   | -1174  | 25       | Flavoheмоprotein b5+b5R                                                      | Energy production and conversion                                                                |
| 64752      | -102    | -92    | 10       | DNA-directed RNA polymerase, subunit RPB10                                   | Transcription                                                                                   |
| 79690      | -225    | -201   | 24       | Electron transfer flavoprotein ubiquinone oxidoreductase                     | Energy production and conversion                                                                |

|               |       |       |    |                                                                                                                                                       |                                                                      |
|---------------|-------|-------|----|-------------------------------------------------------------------------------------------------------------------------------------------------------|----------------------------------------------------------------------|
| <b>122778</b> | -1050 | -1039 | 11 | Aldo/keto reductase family proteins                                                                                                                   | General function prediction only                                     |
| <b>109404</b> | -1113 | -1102 | 11 | Splicing coactivator SRm160/300, subunit SRm300                                                                                                       | RNA processing and modification                                      |
| <b>22830</b>  | -1338 | -1324 | 14 | Glutathione S-transferase                                                                                                                             | Posttranslational modification, protein turnover, chaperones         |
| <b>4843</b>   | -193  | -170  | 23 | Carbon-nitrogen hydrolase                                                                                                                             | Amino acid transport and metabolism                                  |
| <b>4843</b>   | -170  | -159  | 11 | Carbon-nitrogen hydrolase                                                                                                                             | Amino acid transport and metabolism                                  |
| <b>65921</b>  | -226  | -197  | 29 | 3-Methylcrotonyl-CoA carboxylase, biotin-containing subunit/Propionyl-CoA carboxylase, alpha chain/Acetyl-CoA carboxylase, biotin carboxylase subunit | Amino acid transport and metabolism / Lipid transport and metabolism |
| <b>65921</b>  | -197  | -177  | 20 | 3-Methylcrotonyl-CoA carboxylase, biotin-containing subunit/Propionyl-CoA carboxylase, alpha chain/Acetyl-CoA carboxylase, biotin carboxylase subunit | Amino acid transport and metabolism / Lipid transport and metabolism |
| <b>109793</b> | -1194 | -1184 | 10 | Uncharacterized conserved protein                                                                                                                     | Function unknown                                                     |
| <b>66256</b>  | -328  | -306  | 22 | Dehydrogenases with different specificities (related to short-chain alcohol dehydrogenases)                                                           | Secondary metabolites biosynthesis, transport and catabolism         |
| <b>66311</b>  | -757  | -732  | 25 | Predicted transporter (major facilitator superfamily)                                                                                                 | General function prediction only                                     |
| <b>123124</b> | -1362 | -1336 | 26 | Serine/threonine protein kinase                                                                                                                       | General function prediction only                                     |
| <b>66154</b>  | -1119 | -1099 | 20 | Nucleolar protein-like/EBNA1-binding protein                                                                                                          | RNA processing and modification                                      |
| <b>55263</b>  | -182  | -165  | 17 | Ubiquitin-conjugating enzyme-related protein Ft1, involved in programmed cell death                                                                   | Posttranslational modification, protein turnover, chaperones         |
| <b>55034</b>  | -999  | -988  | 11 | Sexual differentiation process protein ISP4                                                                                                           | Signal transduction mechanisms                                       |
| <b>123468</b> | -1107 | -1088 | 19 | IMP dehydrogenase/GMP reductase                                                                                                                       | Nucleotide transport and metabolism                                  |
| <b>51420</b>  | -1087 | -1074 | 13 | Ribosomal RNA adenine dimethylase                                                                                                                     | RNA processing and modification                                      |
| <b>123561</b> | -990  | -977  | 13 | Subtilisin-like proprotein convertase                                                                                                                 | Posttranslational modification, protein turnover, chaperones         |
| <b>81271</b>  | -240  | -230  | 10 | Sorbitol dehydrogenase                                                                                                                                | Secondary metabolites biosynthesis, transport and catabolism         |
| <b>51558</b>  | -898  | -888  | 10 | Ankyrin repeat protein                                                                                                                                | General function prediction only                                     |
| <b>81450</b>  | -237  | -225  | 12 | Mitochondrial import inner membrane translocase, subunit TIM44                                                                                        | Intracellular trafficking, secretion, and vesicular transport        |
| <b>111426</b> | -355  | -329  | 26 | Splicing coactivator SRm160/300, subunit SRm300                                                                                                       | RNA processing and modification                                      |
| <b>123884</b> | -206  | -177  | 29 | Queuine-tRNA ribosyltransferase                                                                                                                       | RNA processing and modification                                      |
| <b>123989</b> | -757  | -742  | 15 | Uncharacterized conserved protein (tumor-rejection antigen MAGE in humans)                                                                            | Function unknown                                                     |

|               |       |       |    |                                                                                              |                                                                                   |
|---------------|-------|-------|----|----------------------------------------------------------------------------------------------|-----------------------------------------------------------------------------------|
| <b>75139</b>  | -607  | -579  | 28 | Predicted E3 ubiquitin ligase                                                                | Posttranslational modification, protein turnover, chaperones                      |
| <b>75204</b>  | -136  | -111  | 25 | Predicted Zn-finger protein                                                                  | General function prediction only                                                  |
| <b>75205</b>  | -1453 | -1428 | 25 | Nucleotide excision repair complex XPC-HR23B, subunit XPC/DPB11                              | Replication, recombination and repair                                             |
| <b>104180</b> | -1410 | -1384 | 26 | Ankyrin                                                                                      | Cell wall/membrane/envelope biogenesis                                            |
| <b>104211</b> | -1358 | -1342 | 16 | FKBP-type peptidyl-prolyl cis-trans isomerase                                                | Posttranslational modification, protein turnover, chaperones                      |
| <b>75428</b>  | -1338 | -1309 | 29 | Spliceosomal protein snRNP-U1A/U2B                                                           | RNA processing and modification                                                   |
| <b>56363</b>  | -153  | -145  | 8  | Transcriptional regulator                                                                    | Transcription                                                                     |
| <b>23367</b>  | -777  | -766  | 11 | Glucose dehydrogenase/choline dehydrogenase/mandelonitrile lyase (GMC oxidoreductase family) | General function prediction only                                                  |
| <b>82123</b>  | -1336 | -1317 | 19 | Predicted transcription factor DATF1, contains PHD and TFS2M domains                         | Transcription                                                                     |
| <b>70025</b>  | -681  | -658  | 23 | Zinc-binding oxidoreductase                                                                  | Energy production and conversion / General function prediction only               |
| <b>82321</b>  | -980  | -956  | 24 | Aquaporin (major intrinsic protein family)                                                   | Carbohydrate transport and metabolism                                             |
| <b>57274</b>  | -660  | -650  | 10 | WD40 repeat protein                                                                          | General function prediction only                                                  |
| <b>57600</b>  | -511  | -494  | 17 | Global transcriptional regulator, cell division control protein                              | Amino acid transport and metabolism                                               |
| <b>75985</b>  | -934  | -915  | 19 | Mitochondrial associated endoribonuclease MAR1 (isochorismatase superfamily)                 | General function prediction only                                                  |
| <b>105190</b> | -700  | -670  | 30 | Nuclear pore complex, Nup214/CAN component                                                   | Nuclear structure / Intracellular trafficking, secretion, and vesicular transport |
| <b>70956</b>  | -273  | -243  | 30 | Cytochrome P450 CYP3/CYP5/CYP6/CYP9 subfamilies                                              | Secondary metabolites biosynthesis, transport and catabolism                      |
| <b>76329</b>  | -622  | -601  | 21 | Ran-binding protein RANBP1 and related RanBD domain proteins                                 | Intracellular trafficking, secretion, and vesicular transport                     |
| <b>58638</b>  | -1432 | -1420 | 12 | RNA polymerase II transcription factor complex subunit                                       | Transcription                                                                     |
| <b>121019</b> | -542  | -530  | 12 | Succinate dehydrogenase, flavoprotein subunit                                                | Energy production and conversion                                                  |
| <b>58405</b>  | -200  | -174  | 26 | U2 snRNP splicing factor, small subunit, and related proteins                                | RNA processing and modification                                                   |
| <b>58405</b>  | -174  | -155  | 19 | U2 snRNP splicing factor, small subunit, and related proteins                                | RNA processing and modification                                                   |
| <b>6108</b>   | -161  | -146  | 15 | SAM-dependent methyltransferases                                                             | Lipid transport and metabolism / General function prediction only                 |
| <b>121133</b> | -803  | -781  | 22 | Aspartyl protease                                                                            | Posttranslational modification, protein turnover, chaperones                      |

|               |       |       |    |                                                                                                                                                   |                                                                                                      |
|---------------|-------|-------|----|---------------------------------------------------------------------------------------------------------------------------------------------------|------------------------------------------------------------------------------------------------------|
| <b>76887</b>  | -1145 | -1128 | 17 | Aspartyl protease                                                                                                                                 | Posttranslational modification, protein turnover, chaperones                                         |
| <b>121262</b> | -217  | -200  | 17 | Apoptosis-related protein/predicted DNA-binding protein                                                                                           | Cell cycle control, cell division, chromosome partitioning                                           |
| <b>77009</b>  | -347  | -323  | 24 | GTP-binding protein DRG2 (ODN superfamily)                                                                                                        | Signal transduction mechanisms                                                                       |
| <b>77038</b>  | -1349 | -1333 | 16 | Synaptobrevin/VAMP-like protein SEC22                                                                                                             | Intracellular trafficking, secretion, and vesicular transport                                        |
| <b>77099</b>  | -506  | -485  | 21 | Predicted hydrolases or acyltransferases (alpha/beta hydrolase superfamily)                                                                       | General function prediction only                                                                     |
| <b>121656</b> | -57   | -47   | 10 | Nuclear pore complex, Nup98 component (sc Nup145/Nup100/Nup116)                                                                                   | Nuclear structure / Intracellular trafficking, secretion, and vesicular transport                    |
| <b>107082</b> | -800  | -783  | 17 | FOG: RRM domain                                                                                                                                   | General function prediction only                                                                     |
| <b>22271</b>  | -886  | -866  | 20 | Zinc-binding oxidoreductase                                                                                                                       | Energy production and conversion / General function prediction only                                  |
| <b>107360</b> | -739  | -730  | 9  | Prolyl 4-hydroxylase alpha subunit                                                                                                                | Amino acid transport and metabolism                                                                  |
| <b>62071</b>  | -299  | -278  | 21 | Dosage compensation regulatory complex/histone acetyltransferase complex, subunit MSL-3/MRG15/EAF3, and related CHROMO domain-containing proteins | Transcription / Chromatin structure and dynamics                                                     |
| <b>121826</b> | -454  | -434  | 20 | ATP-citrate lyase                                                                                                                                 | Energy production and conversion                                                                     |
| <b>121890</b> | -57   | -34   | 23 | Mitochondrial processing peptidase, alpha subunit                                                                                                 | Posttranslational modification, protein turnover, chaperones                                         |
| <b>121903</b> | -74   | -53   | 21 | Mitochondrial Fe-S cluster biosynthesis protein ISA2 (contains a HesB-like domain)                                                                | Intracellular trafficking, secretion, and vesicular transport / Energy production and conversion     |
| <b>107547</b> | -397  | -368  | 29 | Translation initiation factor 4F, ribosome/mRNA-bridging subunit (eIF-4G)                                                                         | Translation, ribosomal structure and biogenesis                                                      |
| <b>73643</b>  | -143  | -114  | 29 | beta-1,6-N-acetylglucosaminyltransferase, contains WSC domain                                                                                     | Posttranslational modification, protein turnover, chaperones / Carbohydrate transport and metabolism |
| <b>53721</b>  | -906  | -895  | 11 | Predicted alpha-helical protein, potentially involved in replication/repair                                                                       | Replication, recombination and repair                                                                |
| <b>74080</b>  | -1242 | -1212 | 30 | Pantothenate synthetase                                                                                                                           | Coenzyme transport and metabolism                                                                    |
| <b>53503</b>  | -1034 | -1009 | 25 | Predicted transporter (major facilitator superfamily)                                                                                             | General function prediction only                                                                     |
| <b>119871</b> | -1301 | -1286 | 15 | Ras-related small GTPase, Rho type                                                                                                                | General function prediction only                                                                     |
| <b>78496</b>  | -1333 | -1323 | 10 | Flavin-containing monooxygenase                                                                                                                   | Secondary metabolites biosynthesis, transport and catabolism                                         |
| <b>78555</b>  | -1231 | -1223 | 8  | Predicted esterase of the alpha-beta hydrolase superfamily (Neuropathy target esterase), contains cAMP-binding domains                            | General function prediction only                                                                     |
| <b>22678</b>  | -523  | -504  | 19 | Iron/ascorbate family oxidoreductases                                                                                                             | Secondary metabolites biosynthesis, transport and catabolism / General function prediction only      |

|               |       |       |    |                                                                                              |                                                                                                      |
|---------------|-------|-------|----|----------------------------------------------------------------------------------------------|------------------------------------------------------------------------------------------------------|
| <b>64347</b>  | -1072 | -1052 | 20 | Projectin/twitchin and related proteins                                                      | Cytoskeleton                                                                                         |
| <b>122656</b> | -1006 | -981  | 25 | Splicing coactivator SRm160/300, subunit SRm300                                              | RNA processing and modification                                                                      |
| <b>64420</b>  | -1315 | -1305 | 10 | WD40 repeat protein                                                                          | Secondary metabolites biosynthesis, transport and catabolism / General function prediction only      |
| <b>64720</b>  | -795  | -770  | 25 | 1-Acyl dihydroxyacetone phosphate reductase and related dehydrogenases                       | Secondary metabolites biosynthesis, transport and catabolism / General function prediction only      |
| <b>64959</b>  | -1145 | -1134 | 11 | Predicted phosphatase                                                                        | General function prediction only                                                                     |
| <b>64971</b>  | -612  | -594  | 18 | Amino acid transporters                                                                      | Amino acid transport and metabolism                                                                  |
| <b>109285</b> | -1015 | -994  | 21 | Serine/threonine protein kinase                                                              | Signal transduction mechanisms                                                                       |
| <b>50077</b>  | -988  | -974  | 14 | Amino acid transporters                                                                      | Amino acid transport and metabolism                                                                  |
| <b>80058</b>  | -21   | -9    | 12 | Predicted transporter (major facilitator superfamily)                                        | General function prediction only                                                                     |
| <b>65950</b>  | -1300 | -1276 | 24 | Triglyceride lipase-cholesterol esterase                                                     | Lipid transport and metabolism                                                                       |
| <b>4990</b>   | -1316 | -1294 | 22 | Dehydrogenases with different specificities (related to short-chain alcohol dehydrogenases)  | Secondary metabolites biosynthesis, transport and catabolism                                         |
| <b>66296</b>  | -627  | -601  | 26 | Eukaryotic-type DNA primase, large subunit                                                   | Replication, recombination and repair                                                                |
| <b>5063</b>   | -270  | -241  | 29 | SWI-SNF chromatin-remodeling complex protein                                                 | Chromatin structure and dynamics                                                                     |
| <b>120008</b> | -1332 | -1317 | 15 | Glucose dehydrogenase/choline dehydrogenase/mandelonitrile lyase (GMC oxidoreductase family) | General function prediction only                                                                     |
| <b>55060</b>  | -443  | -415  | 28 | Kinesin (SMY1 subfamily)                                                                     | Cytoskeleton                                                                                         |
| <b>44928</b>  | -718  | -707  | 11 | 5-formyltetrahydrofolate cyclo-ligase                                                        | Coenzyme transport and metabolism                                                                    |
| <b>55088</b>  | -1346 | -1321 | 25 | NADH:ubiquinone oxidoreductase, NDUFS4/18 kDa subunit                                        | Energy production and conversion                                                                     |
| <b>110813</b> | -178  | -169  | 9  | Amino acid transporters                                                                      | Amino acid transport and metabolism                                                                  |
| <b>67938</b>  | -823  | -799  | 24 | Reductases with broad range of substrate specificities                                       | General function prediction only                                                                     |
| <b>68364</b>  | -970  | -960  | 10 | NIMA (never in mitosis)-related G2-specific serine/threonine protein kinase                  | Cell cycle control, cell division, chromosome partitioning                                           |
| <b>68636</b>  | -1332 | -1320 | 12 | Mitochondrial/chloroplast ribosomal protein S11                                              | Translation, ribosomal structure and biogenesis                                                      |
| <b>111194</b> | -894  | -880  | 14 | Predicted GTPase                                                                             | General function prediction only                                                                     |
| <b>111216</b> | -1352 | -1332 | 20 | Histone H3 (Lys9) methyltransferase SUV39H1/Clr4, required for transcriptional silencing     | Transcription / Chromatin structure and dynamics                                                     |
| <b>111345</b> | -930  | -902  | 28 | beta-1,6-N-acetylglucosaminyltransferase, contains WSC domain                                | Posttranslational modification, protein turnover, chaperones / Carbohydrate transport and metabolism |
| <b>68821</b>  | -633  | -623  | 10 | UDP-glucuronosyl and UDP-glucosyl transferase                                                | Energy production and conversion / Carbohydrate                                                      |

|               |       |       |    |                                                                                             |                                                                                                      |
|---------------|-------|-------|----|---------------------------------------------------------------------------------------------|------------------------------------------------------------------------------------------------------|
|               |       |       |    |                                                                                             | transport and metabolism                                                                             |
| <b>68813</b>  | -1163 | -1137 | 26 | Permease of the major facilitator superfamily                                               | Carbohydrate transport and metabolism                                                                |
| <b>82026</b>  | -1077 | -1049 | 28 | Predicted methyltransferase                                                                 | General function prediction only                                                                     |
| <b>23346</b>  | -417  | -388  | 29 | Beta-N-acetylhexosaminidase                                                                 | Carbohydrate transport and metabolism                                                                |
| <b>75380</b>  | -710  | -685  | 25 | Permease of the major facilitator superfamily                                               | Carbohydrate transport and metabolism                                                                |
| <b>104495</b> | -1079 | -1071 | 8  | RNA helicase                                                                                | RNA processing and modification                                                                      |
| <b>104557</b> | -303  | -280  | 23 | Dehydrogenases with different specificities (related to short-chain alcohol dehydrogenases) | Secondary metabolites biosynthesis, transport and catabolism                                         |
| <b>72685</b>  | -418  | -406  | 12 | 6-phosphogluconate dehydrogenase                                                            | Carbohydrate transport and metabolism                                                                |
| <b>124031</b> | -1160 | -1141 | 19 | 20S proteasome, regulatory subunit alpha type PSMA4/PRE9                                    | Posttranslational modification, protein turnover, chaperones                                         |
| <b>82235</b>  | -240  | -228  | 12 | Maltase glucoamylase and related hydrolases, glycosyl hydrolase family 31                   | Carbohydrate transport and metabolism                                                                |
| <b>5916</b>   | -1073 | -1063 | 10 | Histone acetyltransferase (MYST family)                                                     | Chromatin structure and dynamics                                                                     |
| <b>5916</b>   | -1063 | -1035 | 28 | Histone acetyltransferase (MYST family)                                                     | Chromatin structure and dynamics                                                                     |
| <b>82385</b>  | -1182 | -1156 | 26 | Methionyl-tRNA synthetase                                                                   | Translation, ribosomal structure and biogenesis                                                      |
| <b>70646</b>  | -526  | -504  | 22 | Beta, beta-carotene 15,15'-dioxygenase and related enzymes                                  | Secondary metabolites biosynthesis, transport and catabolism                                         |
| <b>57322</b>  | -165  | -155  | 10 | Aromatic amino acid aminotransferase and related proteins                                   | Amino acid transport and metabolism                                                                  |
| <b>104831</b> | -1064 | -1037 | 27 | Splicing coactivator SRm160/300, subunit SRm300                                             | RNA processing and modification                                                                      |
| <b>104831</b> | -91   | -66   | 25 | Splicing coactivator SRm160/300, subunit SRm300                                             | RNA processing and modification                                                                      |
| <b>120789</b> | -1047 | -1030 | 17 | Alpha tubulin                                                                               | Cytoskeleton                                                                                         |
| <b>120803</b> | -114  | -89   | 25 | Predicted divalent cation transporter                                                       | Inorganic ion transport and metabolism                                                               |
| <b>120821</b> | -310  | -297  | 13 | von Willebrand factor and related coagulation proteins                                      | Defense mechanisms / Extracellular structures                                                        |
| <b>57433</b>  | -777  | -760  | 17 | Subtilisin kexin isozyme-1/site 1 protease, subtilase superfamily                           | Posttranslational modification, protein turnover, chaperones                                         |
| <b>105189</b> | -1282 | -1252 | 30 | 20S proteasome, regulatory subunit beta type PSMB7/PSMB10/PUP1                              | Posttranslational modification, protein turnover, chaperones                                         |
| <b>112520</b> | -827  | -800  | 27 | beta-1,6-N-acetylglucosaminyltransferase, contains WSC domain                               | Posttranslational modification, protein turnover, chaperones / Carbohydrate transport and metabolism |
| <b>105216</b> | -792  | -779  | 13 | Ankyrin                                                                                     | Cell wall/membrane/envelope biogenesis                                                               |
| <b>59056</b>  | -1263 | -1255 | 8  | Acyl-CoA thioesterase                                                                       | Lipid transport and metabolism                                                                       |

|               |       |       |    |                                                                                                                     |                                                                               |
|---------------|-------|-------|----|---------------------------------------------------------------------------------------------------------------------|-------------------------------------------------------------------------------|
| <b>58851</b>  | -1279 | -1267 | 12 | Phosphatidylserine-specific receptor PtdSerR, contains JmjC domain                                                  | Chromatin structure and dynamics 7 Signal transduction mechanisms             |
| <b>76491</b>  | -759  | -733  | 26 | Regulator of Rac1, required for phagocytosis and cell migration                                                     | Signal transduction mechanisms                                                |
| <b>76491</b>  | -733  | -714  | 19 | Regulator of Rac1, required for phagocytosis and cell migration                                                     | Signal transduction mechanisms                                                |
| <b>6103</b>   | -43   | -21   | 22 | Synaptic vesicle transporter SVOP and related transporters (major facilitator superfamily)                          | General function prediction only                                              |
| <b>73110</b>  | -759  | -737  | 22 | Diamine acetyltransferase                                                                                           | Amino acid transport and metabolism                                           |
| <b>76710</b>  | -538  | -525  | 13 | RNA polymerase III, large subunit                                                                                   | Transcription                                                                 |
| <b>121230</b> | -170  | -145  | 25 | Squalene monooxygenase                                                                                              | Lipid transport and metabolism                                                |
| <b>106148</b> | -478  | -461  | 17 | DNA-binding protein C1D involved in regulation of double-strand break repair                                        | Replication, recombination and repair                                         |
| <b>77007</b>  | -1457 | -1433 | 24 | FOG: RRM domain                                                                                                     | General function prediction only                                              |
| <b>77364</b>  | -1150 | -1125 | 25 | Ubiquitin-specific protease                                                                                         | Posttranslational modification, protein turnover, chaperones                  |
| <b>60951</b>  | -686  | -656  | 30 | Putative Zn-finger protein                                                                                          | General function prediction only                                              |
| <b>121664</b> | -203  | -182  | 21 | Glutamate decarboxylase and related proteins                                                                        | Amino acid transport and metabolism                                           |
| <b>77647</b>  | -255  | -242  | 13 | Threonine aldolase                                                                                                  | Amino acid transport and metabolism                                           |
| <b>60768</b>  | -1129 | -1112 | 17 | Predicted peptidyl-tRNA hydrolase                                                                                   | Translation, ribosomal structure and biogenesis                               |
| <b>22264</b>  | -915  | -895  | 20 | Apoptosis antagonizing transcription factor/protein transport protein                                               | Transcription / Intracellular trafficking, secretion, and vesicular transport |
| <b>121901</b> | -1161 | -1140 | 21 | Translation initiation factor 3, subunit c (eIF-3c)                                                                 | Translation, ribosomal structure and biogenesis                               |
| <b>61750</b>  | -105  | -76   | 29 | Sphingolipid hydroxylase                                                                                            | Lipid transport and metabolism                                                |
| <b>27599</b>  | -1152 | -1122 | 30 | Mitochondrial Fe <sup>2+</sup> transporter MMT1 and related transporters (cation diffusion facilitator superfamily) | Inorganic ion transport and metabolism                                        |
| <b>60402</b>  | -143  | -127  | 16 | Mitochondrial GTPase                                                                                                | Translation, ribosomal structure and biogenesis                               |
| <b>35202</b>  | -190  | -167  | 23 | Helicases                                                                                                           | Replication, recombination and repair                                         |
| <b>61948</b>  | -1449 | -1440 | 9  | Protein disulfide isomerase (prolyl 4-hydroxylase beta subunit)                                                     | Posttranslational modification, protein turnover, chaperones                  |
| <b>40290</b>  | -251  | -222  | 29 | Putative translation initiation inhibitor UK114/IBM1                                                                | Translation, ribosomal structure and biogenesis                               |
| <b>55595</b>  | -838  | -822  | 16 | Ca <sup>2+</sup> /H <sup>+</sup> antiporter VCX1 and related proteins                                               | Inorganic ion transport and metabolism                                        |
| <b>21396</b>  | -83   | -63   | 20 | unknown protein                                                                                                     | -                                                                             |
| <b>62475</b>  | -555  | -528  | 27 | unknown protein                                                                                                     | -                                                                             |

|               |       |       |    |                 |   |
|---------------|-------|-------|----|-----------------|---|
| <b>78499</b>  | -1234 | -1224 | 10 | unknown protein | - |
| <b>122178</b> | -777  | -761  | 16 | unknown protein | - |
| <b>108251</b> | -321  | -310  | 11 | unknown protein | - |
| <b>79238</b>  | -1149 | -1129 | 20 | unknown protein | - |
| <b>122576</b> | -841  | -819  | 22 | unknown protein | - |
| <b>64172</b>  | -99   | -79   | 20 | unknown protein | - |
| <b>65948</b>  | -1228 | -1204 | 24 | unknown protein | - |
| <b>80340</b>  | -864  | -844  | 20 | unknown protein | - |
| <b>123282</b> | -72   | -58   | 14 | unknown protein | - |
| <b>74576</b>  | -661  | -648  | 13 | unknown protein | - |
| <b>55561</b>  | -1198 | -1183 | 15 | unknown protein | - |
| <b>45153</b>  | -136  | -111  | 25 | unknown protein | - |
| <b>68291</b>  | -1167 | -1137 | 30 | unknown protein | - |
| <b>68930</b>  | -70   | -45   | 25 | unknown protein | - |
| <b>111514</b> | -582  | -564  | 18 | unknown protein | - |
| <b>72526</b>  | -236  | -227  | 9  | unknown protein | - |
| <b>72526</b>  | -227  | -206  | 21 | unknown protein | - |
| <b>82032</b>  | -609  | -580  | 29 | unknown protein | - |
| <b>104075</b> | -321  | -293  | 28 | unknown protein | - |
| <b>104399</b> | -1491 | -1476 | 15 | unknown protein | - |
| <b>104584</b> | -831  | -810  | 21 | unknown protein | - |
| <b>82227</b>  | -659  | -643  | 16 | unknown protein | - |
| <b>82286</b>  | -246  | -236  | 10 | unknown protein | - |
| <b>82286</b>  | -236  | -208  | 28 | unknown protein | - |
| <b>124119</b> | -888  | -877  | 11 | unknown protein | - |
| <b>124119</b> | -660  | -651  | 9  | unknown protein | - |
| <b>112392</b> | -397  | -384  | 13 | unknown protein | - |
| <b>57527</b>  | -1037 | -1024 | 13 | unknown protein | - |



|        |       |       |    |                 |   |
|--------|-------|-------|----|-----------------|---|
| 112603 | -56   | -39   | 17 | unknown protein | - |
| 58244  | -1335 | -1327 | 8  | unknown protein | - |
| 121107 | -1258 | -1246 | 12 | unknown protein | - |
| 121121 | -83   | -56   | 27 | unknown protein | - |
| 105849 | -371  | -353  | 18 | unknown protein | - |
| 76820  | -622  | -596  | 26 | unknown protein | - |
| 73231  | -325  | -296  | 29 | unknown protein | - |
| 60337  | -109  | -100  | 9  | unknown protein | - |
| 106755 | -521  | -496  | 25 | unknown protein | - |
| 74223  | -396  | -410  | 14 | unknown protein | - |
| 108011 | -1026 | -1013 | 13 | unknown protein | - |
| 122262 | -1265 | -1244 | 21 | unknown protein | - |
| 63952  | -1010 | -999  | 11 | unknown protein | - |
| 64011  | -726  | -715  | 11 | unknown protein | - |
| 109317 | -150  | -126  | 24 | unknown protein | - |
| 80181  | -290  | -266  | 24 | unknown protein | - |
| 109790 | -1042 | -1013 | 29 | unknown protein | - |
| 109790 | -1013 | -993  | 20 | unknown protein | - |
| 109846 | -871  | -863  | 8  | unknown protein | - |
| 110127 | -345  | -322  | 23 | unknown protein | - |
| 123261 | -939  | -920  | 19 | unknown protein | - |
| 123261 | -681  | -663  | 18 | unknown protein | - |
| 110600 | -172  | -145  | 27 | unknown protein | - |
| 67605  | -716  | -690  | 26 | unknown protein | - |
| 110731 | -999  | -979  | 20 | unknown protein | - |
| 111059 | -298  | -284  | 14 | unknown protein | - |
| 111245 | -151  | -124  | 27 | unknown protein | - |
| 111442 | -976  | -961  | 15 | unknown protein | - |

|               |       |       |    |                 |   |
|---------------|-------|-------|----|-----------------|---|
| <b>69222</b>  | -215  | -186  | 29 | unknown protein | - |
| <b>111739</b> | -466  | -437  | 29 | unknown protein | - |
| <b>69493</b>  | -820  | -804  | 16 | unknown protein | - |
| <b>45445</b>  | -271  | -256  | 15 | unknown protein | - |
| <b>104380</b> | -640  | -614  | 26 | unknown protein | - |
| <b>112122</b> | -1208 | -1188 | 20 | unknown protein | - |
| <b>124175</b> | -1324 | -1299 | 25 | unknown protein | - |
| <b>104838</b> | -1067 | -1050 | 17 | unknown protein | - |
| <b>57730</b>  | -1036 | -1028 | 8  | unknown protein | - |
| <b>112518</b> | -931  | -921  | 10 | unknown protein | - |
| <b>105454</b> | -391  | -369  | 22 | unknown protein | - |
| <b>121082</b> | -825  | -804  | 21 | unknown protein | - |
| <b>59244</b>  | -1101 | -1090 | 11 | unknown protein | - |
| <b>3488</b>   | -642  | -618  | 24 | unknown protein | - |
| <b>60445</b>  | -956  | -929  | 27 | unknown protein | - |
| <b>121471</b> | -1149 | -1134 | 15 | unknown protein | - |
| <b>77481</b>  | -1168 | -1152 | 16 | unknown protein | - |
| <b>77780</b>  | -747  | -727  | 20 | unknown protein | - |
| <b>107490</b> | -1327 | -1313 | 14 | unknown protein | - |
| <b>33650</b>  | -167  | -141  | 26 | unknown protein | - |
| <b>69557</b>  | -1061 | -1033 | 28 | unknown protein | - |
| <b>63382</b>  | -1133 | -1125 | 8  | unknown protein | - |
| <b>26163</b>  | -1074 | -1058 | 16 | unknown protein | - |

\*Positions of Sites 1 and 2 are relative to the gene start codon.
