# Supplementary material for: Deciphering the Cis-Regulatory Elements for XYR1 and CRE1 Regulators in Trichoderma reesei
Source: PubMed Central journal article supplement (PMC4062390; doi:10.1371/journal.pone.0099366), 2014-06-18
Supplement: pone.0099366.s005.pdf [file pone.0099366.s005.pdf]

**Tables S5.** Genome-wide prediction of CRE1 binding sites in *T. reesei*.

| Protein ID | Site 1* | Site 2 | Distance | Description                                                                              | Functional category                                                                                                                      |
|------------|---------|--------|----------|------------------------------------------------------------------------------------------|------------------------------------------------------------------------------------------------------------------------------------------|
| 54283      | -709    | -700   | 9        | Predicted carbohydrate kinase, contains PfkB domain                                      | General function prediction only                                                                                                         |
| 102572     | -335    | -315   | 20       | Parvulin-like peptidyl-prolyl cis-trans isomerase                                        | Posttranslational modification, protein turnover, chaperones                                                                             |
| 43817      | -912    | -903   | 9        | PHD Zn-finger protein                                                                    | General function prediction only                                                                                                         |
| 53576      | -872    | -862   | 10       | CREB binding protein/P300 and related TAZ Zn-finger proteins                             | Transcription                                                                                                                            |
| 102743     | -500    | -489   | 11       | von Willebrand factor and related coagulation proteins                                   | Defense mechanisms / Extracellular structures                                                                                            |
| 102743     | -191    | -183   | 8        | von Willebrand factor and related coagulation proteins                                   | Defense mechanisms / Extracellular structures                                                                                            |
| 44330      | -1165   | -1155  | 10       | Dual-specificity tyrosine-phosphorylation regulated kinase                               | General function prediction only                                                                                                         |
| 74258      | -1111   | -1084  | 27       | Phenylalanyl-tRNA synthetase beta subunit                                                | Translation, ribosomal structure and biogenesis                                                                                          |
| 2087       | -1354   | -1345  | 9        | Exosomal 3'-5' exoribonuclease complex, subunit Rrp43                                    | Translation, ribosomal structure and biogenesis                                                                                          |
| 74486      | -247    | -238   | 9        | Uncharacterized conserved protein                                                        | Function unknown                                                                                                                         |
| 78176      | -1489   | -1477  | 12       | 1,3-beta-glucan synthase/callose synthase catalytic subunit                              | Cell wall/membrane/envelope biogenesis                                                                                                   |
| 107779     | -835    | -829   | 6        | Predicted alpha/beta hydrolase BEM46                                                     | General function prediction only                                                                                                         |
| 122103     | -61     | -55    | 6        | Predicted nucleotidyltransferase                                                         | General function prediction only                                                                                                         |
| 22538      | -1477   | -1466  | 11       | Vacuolar assembly/sorting protein PEP5/VPS11                                             | Intracellular trafficking, secretion, and vesicular transport                                                                            |
| 78817      | -56     | -27    | 29       | 26S proteasome regulatory complex, ATPase RPT6                                           | Posttranslational modification, protein turnover, chaperones                                                                             |
| 79124      | -807    | -798   | 9        | Kinesin-like protein                                                                     | Cytoskeleton                                                                                                                             |
| 122476     | -536    | -530   | 6        | Protein involved in autophagy and nutrient starvation                                    | Posttranslational modification, protein turnover, chaperones                                                                             |
| 22647      | -85     | -58    | 27       | Microfibrillar-associated protein MFAP1                                                  | Cytoskeleton                                                                                                                             |
| 108697     | -512    | -505   | 7        | Calcium-responsive transcription coactivator                                             | Transcription                                                                                                                            |
| 108706     | -68     | -62    | 6        | Vacuolar sorting protein/ubiquitin receptor VPS23                                        | Intracellular trafficking, secretion, and vesicular transport / Posttranslational modification, protein turnover, chaperones             |
| 64111      | -423    | -412   | 11       | Structural maintenance of chromosome protein SMC5/Spr18, SMC superfamily                 | Replication, recombination and repair / Chromatin structure and dynamics / Cell cycle control, cell division, chromosome partitioning    |
| 108784     | -657    | -638   | 19       | Zinc-binding oxidoreductase                                                              | Energy production and conversion / General function prediction only                                                                      |
| 64193      | -1329   | -1323  | 6        | Transferrin receptor and related proteins containing the protease-associated (PA) domain | Posttranslational modification, protein turnover, chaperones / Inorganic ion transport and metabolism / General function prediction only |

|               |       |       |    |                                                                                                        |                                                                                                                                                     |
|---------------|-------|-------|----|--------------------------------------------------------------------------------------------------------|-----------------------------------------------------------------------------------------------------------------------------------------------------|
| <b>64193</b>  | -1323 | -1317 | 6  | Transferrin receptor and related proteins containing the protease-associated (PA) domain               | Posttranslational modification, protein turnover, chaperones / Inorganic ion transport and metabolism / General function prediction only            |
| <b>64193</b>  | -1317 | -1311 | 6  | Transferrin receptor and related proteins containing the protease-associated (PA) domain               | Posttranslational modification, protein turnover, chaperones / Inorganic ion transport and metabolism / General function prediction only            |
| <b>22731</b>  | -258  | -252  | 6  | Beclin-like protein                                                                                    | Signal transduction mechanisms                                                                                                                      |
| <b>4654</b>   | -319  | -306  | 13 | Histidinol dehydrogenase                                                                               | Amino acid transport and metabolism                                                                                                                 |
| <b>49832</b>  | -839  | -810  | 29 | Translation initiation factor 2C (eIF-2C) and related proteins                                         | Translation, ribosomal structure and biogenesis                                                                                                     |
| <b>79673</b>  | -677  | -670  | 7  | Serine/threonine protein kinase                                                                        | Signal transduction mechanisms                                                                                                                      |
| <b>79741</b>  | -266  | -242  | 24 | Sulfate/bicarbonate/oxalate exchanger SAT-1 and related transporters (SLC26 family)                    | Inorganic ion transport and metabolism                                                                                                              |
| <b>122828</b> | -199  | -186  | 13 | Uncharacterized protein of the uridine kinase family                                                   | Nucleotide transport and metabolism                                                                                                                 |
| <b>79884</b>  | -207  | -193  | 14 | Ubiquitin-like protein                                                                                 | Cell cycle control, cell division, chromosome partitioning / Posttranslational modification, protein turnover, chaperones                           |
| <b>80007</b>  | -1059 | -1040 | 19 | WW domain binding protein WBP-2, contains GRAM domain                                                  | Signal transduction mechanisms                                                                                                                      |
| <b>4905</b>   | -956  | -947  | 9  | VAMP-associated protein involved in inositol metabolism                                                | Intracellular trafficking, secretion, and vesicular transport                                                                                       |
| <b>65969</b>  | -224  | -201  | 23 | Cytoskeletal protein Adducin                                                                           | Signal transduction mechanisms / Cytoskeleton                                                                                                       |
| <b>4947</b>   | -173  | -167  | 6  | TRAPP 20 K subunit                                                                                     | Intracellular trafficking, secretion, and vesicular transport                                                                                       |
| <b>27085</b>  | -737  | -707  | 30 | KRR1-interacting protein involved in 40S ribosome biogenesis                                           | Translation, ribosomal structure and biogenesis                                                                                                     |
| <b>109779</b> | -134  | -127  | 7  | von Willebrand factor and related coagulation proteins                                                 | Defense mechanisms / Extracellular structures                                                                                                       |
| <b>123030</b> | -796  | -785  | 11 | RhoGEF GTPase                                                                                          | Signal transduction mechanisms                                                                                                                      |
| <b>80231</b>  | -133  | -127  | 6  | Hexokinase                                                                                             | Carbohydrate transport and metabolism                                                                                                               |
| <b>66405</b>  | -1363 | -1355 | 8  | Transcription initiation factor TFIID, subunit TAF5 (also component of histone acetyltransferase SAGA) | Transcription                                                                                                                                       |
| <b>123114</b> | -1289 | -1262 | 27 | Molecular chaperone (HSP90 family)                                                                     | Posttranslational modification, protein turnover, chaperones                                                                                        |
| <b>123226</b> | -754  | -742  | 12 | Neutral trehalase                                                                                      | Carbohydrate transport and metabolism                                                                                                               |
| <b>120172</b> | -100  | -92   | 8  | Fe-S oxidoreductase                                                                                    | Energy production and conversion                                                                                                                    |
| <b>2384</b>   | -543  | -535  | 8  | Signaling protein SWIFT and related BRCT domain proteins                                               | Transcription / Replication, recombination and repair / Cell cycle control, cell division, chromosome partitioning / Signal transduction mechanisms |
| <b>55180</b>  | -938  | -921  | 17 | COP9 signalosome, subunit CSN6                                                                         | Signal transduction mechanisms / Posttranslational modification, protein turnover, chaperones                                                       |
| <b>55172</b>  | -782  | -767  | 15 | Isoamyl acetate-hydrolyzing esterase and related enzymes                                               | General function prediction only                                                                                                                    |

|               |       |       |    |                                                                                             |                                                                                                                |
|---------------|-------|-------|----|---------------------------------------------------------------------------------------------|----------------------------------------------------------------------------------------------------------------|
| <b>80833</b>  | -1424 | -1398 | 26 | Chitinase                                                                                   | Carbohydrate transport and metabolism                                                                          |
| <b>23050</b>  | -1126 | -1118 | 8  | Small Nuclear ribonucleoprotein splicing factor                                             | RNA processing and modification                                                                                |
| <b>81102</b>  | -1088 | -1070 | 18 | Flavin-containing monooxygenase                                                             | Secondary metabolites biosynthesis, transport and catabolism                                                   |
| <b>68107</b>  | -979  | -973  | 6  | Ubiquitin-like/40S ribosomal S30 protein fusion                                             | Translation, ribosomal structure and biogenesis / Posttranslational modification, protein turnover, chaperones |
| <b>81303</b>  | -129  | -108  | 21 | Fumarate reductase, flavoprotein subunit                                                    | Energy production and conversion                                                                               |
| <b>111102</b> | -308  | -302  | 6  | Glycosylphosphatidylinositol-specific phospholipase C                                       | Signal transduction mechanisms                                                                                 |
| <b>111102</b> | -302  | -296  | 6  | Glycosylphosphatidylinositol-specific phospholipase C                                       | Signal transduction mechanisms                                                                                 |
| <b>68622</b>  | -1055 | -1046 | 9  | Uncharacterized conserved protein                                                           | Function unknown                                                                                               |
| <b>123705</b> | -1173 | -1145 | 28 | UDP-glucose/GDP-mannose dehydrogenase                                                       | Signal transduction mechanisms / Carbohydrate transport and metabolism                                         |
| <b>111417</b> | -1083 | -1077 | 6  | Dehydrogenases with different specificities (related to short-chain alcohol dehydrogenases) | Secondary metabolites biosynthesis, transport and catabolism                                                   |
| <b>5656</b>   | -178  | -165  | 13 | Predicted transporter (major facilitator superfamily)                                       | General function prediction only                                                                               |
| <b>69122</b>  | -859  | -848  | 11 | Fatty acid desaturase                                                                       | Lipid transport and metabolism                                                                                 |
| <b>69068</b>  | -760  | -751  | 9  | Predicted ubiquitin regulatory protein                                                      | Posttranslational modification, protein turnover, chaperones                                                   |
| <b>81843</b>  | -287  | -275  | 12 | Alkaline phosphatase                                                                        | Inorganic ion transport and metabolism                                                                         |
| <b>81859</b>  | -559  | -534  | 25 | Ubiquitin carboxyl-terminal hydrolase                                                       | Posttranslational modification, protein turnover, chaperones                                                   |
| <b>123946</b> | -580  | -562  | 18 | Predicted dehydrogenase                                                                     | Secondary metabolites biosynthesis, transport and catabolism                                                   |
| <b>104180</b> | -197  | -173  | 24 | Ankyrin                                                                                     | Cell wall/membrane/envelope biogenesis                                                                         |
| <b>56792</b>  | -747  | -737  | 10 | Predicted mitochondrial cholesterol transporter                                             | Signal transduction mechanisms / Lipid transport and metabolism                                                |
| <b>56515</b>  | -1465 | -1438 | 27 | Mismatch repair ATPase MSH4 (MutS family)                                                   | Replication, recombination and repair                                                                          |
| <b>120391</b> | -76   | -61   | 15 | Serine/threonine protein kinase                                                             | Signal transduction mechanisms                                                                                 |
| <b>57010</b>  | -692  | -686  | 6  | Protein geranylgeranyltransferase Type I, beta subunit                                      | Posttranslational modification, protein turnover, chaperones                                                   |
| <b>75397</b>  | -428  | -405  | 23 | Vacuolar assembly/sorting protein VPS9                                                      | Intracellular trafficking, secretion, and vesicular transport                                                  |
| <b>2648</b>   | -182  | -160  | 22 | Predicted component of NuA3 histone acetyltransferase complex                               | Chromatin structure and dynamics                                                                               |
| <b>75444</b>  | -89   | -74   | 15 | COP9 signalosome, subunit CSN4                                                              | Signal transduction mechanisms / Posttranslational modification, protein turnover, chaperones                  |
| <b>75444</b>  | -42   | -36   | 6  | COP9 signalosome, subunit CSN4                                                              | Signal transduction mechanisms / Posttranslational modification, protein turnover, chaperones                  |
| <b>72661</b>  | -106  | -99   | 7  | Serine/threonine protein kinase                                                             | Signal transduction mechanisms                                                                                 |

|               |       |       |    |                                                                           |                                                                                                    |
|---------------|-------|-------|----|---------------------------------------------------------------------------|----------------------------------------------------------------------------------------------------|
| <b>104535</b> | -1485 | -1463 | 22 | Telomerase elongation inhibitor/RNA maturation protein PINX1              | RNA processing and modification / Cell cycle control, cell division, chromosome partitioning       |
| <b>75568</b>  | -1479 | -1463 | 16 | Thioredoxin-like protein                                                  | Posttranslational modification, protein turnover, chaperones                                       |
| <b>2745</b>   | -128  | -119  | 9  | Fumarase                                                                  | Energy production and conversion                                                                   |
| <b>124094</b> | -400  | -394  | 6  | Predicted methyltransferase                                               | General function prediction only                                                                   |
| <b>5927</b>   | -259  | -232  | 27 | Serine carboxypeptidases (lysosomal cathepsin A)                          | Posttranslational modification, protein turnover, chaperones / Amino acid transport and metabolism |
| <b>70548</b>  | -158  | -152  | 6  | Ras1 guanine nucleotide exchange factor                                   | Signal transduction mechanisms                                                                     |
| <b>124181</b> | -1059 | -1044 | 15 | Members of tubulin/FtsZ family                                            | Cytoskeleton                                                                                       |
| <b>82499</b>  | -201  | -177  | 24 | Predicted integral membrane protein                                       | General function prediction only                                                                   |
| <b>120623</b> | -901  | -894  | 7  | Nuclear receptor coregulator SMRT/SMRTER, contains Myb-like domains       | Transcription                                                                                      |
| <b>120623</b> | -894  | -887  | 7  | Nuclear receptor coregulator SMRT/SMRTER, contains Myb-like domains       | Transcription                                                                                      |
| <b>21752</b>  | -1103 | -1092 | 11 | Amphiphysin                                                               | Intracellular trafficking, secretion, and vesicular transport                                      |
| <b>46247</b>  | -962  | -939  | 23 | WD40 repeat-containing protein                                            | General function prediction only                                                                   |
| <b>76117</b>  | -159  | -146  | 13 | Defense-related protein containing SCP domain                             | Function unknown                                                                                   |
| <b>76117</b>  | -146  | -140  | 6  | Defense-related protein containing SCP domain                             | Function unknown                                                                                   |
| <b>57609</b>  | -1466 | -1450 | 16 | Heterochromatin-associated protein HP1 and related CHROMO domain proteins | Chromatin structure and dynamics                                                                   |
| <b>105191</b> | -1220 | -1190 | 30 | RNA polymerase I and III, subunit RPA40/RPC40                             | Transcription                                                                                      |
| <b>57335</b>  | -195  | -172  | 23 | Uncharacterized conserved protein                                         | Function unknown                                                                                   |
| <b>52847</b>  | -604  | -589  | 15 | NADH:ubiquinone oxidoreductase, NDUFA5/B13 subunit                        | Energy production and conversion                                                                   |
| <b>124285</b> | -674  | -665  | 9  | Small nuclear ribonucleoprotein SMD1 and related snRNPs                   | RNA processing and modification                                                                    |
| <b>105342</b> | -766  | -749  | 17 | von Willebrand factor and related coagulation proteins                    | Defense mechanisms / Extracellular structures                                                      |
| <b>76336</b>  | -1434 | -1428 | 6  | Mitofusin 1 GTPase, involved in mitochondria biogenesis                   | Posttranslational modification, protein turnover, chaperones                                       |
| <b>105432</b> | -947  | -938  | 9  | FOG: Immunoglobulin and related proteins                                  | Inorganic ion transport and metabolism / General function prediction only                          |
| <b>59014</b>  | -1217 | -1211 | 6  | Pleiotropic drug resistance proteins (PDR1-15), ABC superfamily           | Secondary metabolites biosynthesis, transport and catabolism                                       |
| <b>59014</b>  | -1211 | -1199 | 12 | Pleiotropic drug resistance proteins (PDR1-15), ABC superfamily           | Secondary metabolites biosynthesis, transport and catabolism                                       |
| <b>59014</b>  | -1199 | -1193 | 6  | Pleiotropic drug resistance proteins (PDR1-15), ABC superfamily           | Secondary metabolites biosynthesis, transport and catabolism                                       |

|               |       |       |    |                                                                                                  |                                                                                                     |
|---------------|-------|-------|----|--------------------------------------------------------------------------------------------------|-----------------------------------------------------------------------------------------------------|
| <b>59014</b>  | -1193 | -1187 | 6  | Pleiotropic drug resistance proteins (PDR1-15), ABC superfamily                                  | Secondary metabolites biosynthesis, transport and catabolism                                        |
| <b>58539</b>  | -659  | -653  | 6  | Mitochondrial ribosome small subunit component, mediator of apoptosis DAP3                       | Translation, ribosomal structure and biogenesis                                                     |
| <b>121158</b> | -1320 | -1297 | 23 | Serine/threonine protein kinase                                                                  | Signal transduction mechanisms                                                                      |
| <b>105931</b> | -761  | -755  | 6  | Beta-N-acetylhexosaminidase                                                                      | Carbohydrate transport and metabolism                                                               |
| <b>105931</b> | -755  | -738  | 17 | Beta-N-acetylhexosaminidase                                                                      | Carbohydrate transport and metabolism                                                               |
| <b>105931</b> | -738  | -721  | 17 | Beta-N-acetylhexosaminidase                                                                      | Carbohydrate transport and metabolism                                                               |
| <b>105931</b> | -721  | -704  | 17 | Beta-N-acetylhexosaminidase                                                                      | Carbohydrate transport and metabolism                                                               |
| <b>105931</b> | -704  | -680  | 24 | Beta-N-acetylhexosaminidase                                                                      | Carbohydrate transport and metabolism                                                               |
| <b>106051</b> | -819  | -813  | 6  | Transcription factor TCF20                                                                       | Transcription                                                                                       |
| <b>106067</b> | -1137 | -1130 | 7  | Mitochondrial chaperonin                                                                         | Posttranslational modification, protein turnover, chaperones                                        |
| <b>47069</b>  | -177  | -165  | 12 | 3'-5' exonuclease                                                                                | Replication, recombination and repair                                                               |
| <b>60346</b>  | -85   | -74   | 11 | Para-aminobenzoate (PABA) synthase ABZ1                                                          | Translation, ribosomal structure and biogenesis                                                     |
| <b>60008</b>  | -1339 | -1318 | 21 | Phosphatidylethanolamine binding protein                                                         | General function prediction only                                                                    |
| <b>60873</b>  | -84   | -55   | 29 | ATP-dependent DNA ligase I                                                                       | Replication, recombination and repair                                                               |
| <b>61159</b>  | -49   | -39   | 10 | Subunit of cis-Golgi transport vesicle tethering complex - Sec34p                                | Intracellular trafficking, secretion, and vesicular transport                                       |
| <b>107187</b> | -1093 | -1077 | 16 | Reductases with broad range of substrate specificities                                           | General function prediction only                                                                    |
| <b>3889</b>   | -1330 | -1324 | 6  | von Willebrand factor and related coagulation proteins                                           | Defense mechanisms / Extracellular structures                                                       |
| <b>3889</b>   | -1324 | -1306 | 18 | von Willebrand factor and related coagulation proteins                                           | Defense mechanisms / Extracellular structures                                                       |
| <b>3889</b>   | -1306 | -1300 | 6  | von Willebrand factor and related coagulation proteins                                           | Defense mechanisms / Extracellular structures                                                       |
| <b>3889</b>   | -1300 | -1282 | 18 | von Willebrand factor and related coagulation proteins                                           | Defense mechanisms / Extracellular structures                                                       |
| <b>121777</b> | -1222 | -1216 | 6  | Halotolerance protein HAL3 (contains flavoprotein domain)                                        | Cell cycle control, cell division, chromosome partitioning / Inorganic ion transport and metabolism |
| <b>107323</b> | -265  | -251  | 14 | Predicted 3-ketosphinganine reductase                                                            | Secondary metabolites biosynthesis, transport and catabolism                                        |
| <b>121820</b> | -279  | -270  | 9  | Methionine synthase II (cobalamin-independent)                                                   | Amino acid transport and metabolism                                                                 |
| <b>77991</b>  | -578  | -561  | 17 | RNA polymerase II transcription initiation/nucleotide excision repair factor TFIIH, subunit SSL1 | Transcription / Replication, recombination and repair                                               |
| <b>78072</b>  | -617  | -596  | 21 | Amidases                                                                                         | Translation, ribosomal structure and biogenesis                                                     |
| <b>121915</b> | -894  | -884  | 10 | Microtubule-binding protein (translationally controlled tumor protein)                           | Cell cycle control, cell division, chromosome partitioning / Cytoskeleton                           |

|               |       |       |    |                                                                                         |                                                                                                       |
|---------------|-------|-------|----|-----------------------------------------------------------------------------------------|-------------------------------------------------------------------------------------------------------|
| <b>54991</b>  | -893  | -884  | 9  | Hydroxysteroid 17-beta dehydrogenase 11                                                 | Secondary metabolites biosynthesis, transport and catabolism                                          |
| <b>53437</b>  | -305  | -278  | 27 | Putative RNA polymerase II regulator                                                    | Transcription                                                                                         |
| <b>44041</b>  | -403  | -394  | 9  | NADH-ubiquinone oxidoreductase, NDUFS1/75 kDa subunit                                   | Energy production and conversion                                                                      |
| <b>102947</b> | -165  | -135  | 30 | Speckle-type POZ protein SPOP and related proteins with TRAF, MATH and BTB/POZ domains  | Cell cycle control, cell division, chromosome partitioning / General function prediction only         |
| <b>21324</b>  | -1145 | -1118 | 27 | Protein phosphatase 2A regulatory subunit A and related proteins                        | Signal transduction mechanisms                                                                        |
| <b>54144</b>  | -187  | -178  | 9  | Ferric reductase, NADH/NADPH oxidase and related proteins                               | Inorganic ion transport and metabolism / Secondary metabolites biosynthesis, transport and catabolism |
| <b>53685</b>  | -1412 | -1405 | 7  | Type I phosphodiesterase/nucleotide pyrophosphatase                                     | General function prediction only                                                                      |
| <b>33273</b>  | -1174 | -1165 | 9  | Mitochondrial/chloroplast ribosomal protein L17                                         | Translation, ribosomal structure and biogenesis                                                       |
| <b>103350</b> | -417  | -396  | 21 | Mitochondrial ribosomal protein S28                                                     | Translation, ribosomal structure and biogenesis                                                       |
| <b>4064</b>   | -1321 | -1311 | 10 | Threonine/serine dehydratases                                                           | Amino acid transport and metabolism                                                                   |
| <b>34197</b>  | -1201 | -1195 | 6  | Stress-induced protein UVI31+                                                           | Signal transduction mechanisms                                                                        |
| <b>62706</b>  | -1095 | -1089 | 6  | Protein phosphatase 1, regulatory subunit, and related proteins                         | Signal transduction mechanisms                                                                        |
| <b>62314</b>  | -1329 | -1323 | 6  | Transcription initiation factor TFIID, subunit BDF1 and related bromodomain proteins    | Transcription                                                                                         |
| <b>122124</b> | -899  | -879  | 20 | AAA+-type ATPase                                                                        | Posttranslational modification, protein turnover, chaperones                                          |
| <b>78582</b>  | -723  | -708  | 15 | Protoheme ferro-lyase (ferrochelatase)                                                  | Coenzyme transport and metabolism                                                                     |
| <b>4213</b>   | -22   | -11   | 11 | Ribonuclease, T2 family                                                                 | RNA processing and modification                                                                       |
| <b>63206</b>  | -1089 | -1074 | 15 | Putative zinc transporter                                                               | Inorganic ion transport and metabolism                                                                |
| <b>122240</b> | -337  | -328  | 9  | Carnitine O-acyltransferase CPT2/YAT1                                                   | Lipid transport and metabolism                                                                        |
| <b>36727</b>  | -511  | -505  | 6  | SWI-SNF chromatin-remodeling complex protein                                            | Chromatin structure and dynamics                                                                      |
| <b>78909</b>  | -1333 | -1324 | 9  | NDR and related serine/threonine kinases                                                | General function prediction only                                                                      |
| <b>4475</b>   | -743  | -716  | 27 | C-3 sterol dehydrogenase/3-beta-hydroxysteroid dehydrogenase and related dehydrogenases | Amino acid transport and metabolism / Lipid transport and metabolism                                  |
| <b>63882</b>  | -622  | -613  | 9  | Enoyl-CoA hydratase                                                                     | Lipid transport and metabolism                                                                        |
| <b>79244</b>  | -1310 | -1303 | 7  | Serine/threonine protein kinase                                                         | Signal transduction mechanisms                                                                        |
| <b>108783</b> | -1188 | -1169 | 19 | Flavin-containing monooxygenase                                                         | Secondary metabolites biosynthesis, transport and catabolism                                          |
| <b>79324</b>  | -107  | -89   | 18 | Flavonol reductase/cinnamoyl-CoA reductase                                              | Defense mechanisms                                                                                    |
| <b>79329</b>  | -306  | -276  | 30 | Permease of the major facilitator superfamily                                           | General function prediction only                                                                      |

|               |       |       |    |                                                                                                            |                                                                                                            |
|---------------|-------|-------|----|------------------------------------------------------------------------------------------------------------|------------------------------------------------------------------------------------------------------------|
| <b>79345</b>  | -1160 | -1151 | 9  | Peroxisomal membrane protein MPV17 and related proteins                                                    | General function prediction only                                                                           |
| <b>64545</b>  | -391  | -385  | 6  | Monocarboxylate transporter                                                                                | Carbohydrate transport and metabolism                                                                      |
| <b>109007</b> | -953  | -947  | 6  | FOG: Low-complexity                                                                                        | Function unknown                                                                                           |
| <b>22785</b>  | -604  | -581  | 23 | FOG: Zn-finger                                                                                             | General function prediction only                                                                           |
| <b>22785</b>  | -296  | -290  | 6  | FOG: Zn-finger                                                                                             | General function prediction only                                                                           |
| <b>65142</b>  | -84   | -78   | 6  | Aldehyde dehydrogenase                                                                                     | Energy production and conversion                                                                           |
| <b>109397</b> | -1191 | -1178 | 13 | Uncharacterized conserved protein                                                                          | Function unknown                                                                                           |
| <b>122886</b> | -1332 | -1305 | 27 | Beta tubulin                                                                                               | Cytoskeleton                                                                                               |
| <b>50335</b>  | -1344 | -1335 | 9  | Ras-related small GTPase, Rho type                                                                         | General function prediction only                                                                           |
| <b>122988</b> | -488  | -463  | 25 | Multidrug resistance-associated protein/mitoxantrone resistance protein, ABC superfamily                   | Secondary metabolites biosynthesis, transport and catabolism                                               |
| <b>65925</b>  | -937  | -914  | 23 | Cytosine deaminase FCY1 and related enzymes                                                                | Nucleotide transport and metabolism                                                                        |
| <b>123015</b> | -1243 | -1213 | 30 | GTPase Rab5/YPT51 and related small G protein superfamily GTPases                                          | Intracellular trafficking, secretion, and vesicular transport                                              |
| <b>123029</b> | -1445 | -1437 | 8  | Cu <sup>2+</sup> /Zn <sup>2+</sup> superoxide dismutase SOD1                                               | Inorganic ion transport and metabolism                                                                     |
| <b>65965</b>  | -350  | -326  | 24 | SAM-dependent methyltransferases                                                                           | Lipid transport and metabolism / General function prediction only                                          |
| <b>65821</b>  | -1415 | -1397 | 18 | Uncharacterized conserved protein, contains WD40 repeats                                                   | Function unknown                                                                                           |
| <b>22911</b>  | -64   | -39   | 25 | Glucose-repressible alcohol dehydrogenase transcriptional effector CCR4 and related proteins               | Transcription                                                                                              |
| <b>66484</b>  | -1140 | -1116 | 24 | Guanine nucleotide exchange factor                                                                         | Intracellular trafficking, secretion, and vesicular transport                                              |
| <b>5041</b>   | -1238 | -1211 | 27 | Transcription initiation factor IIE, alpha subunit                                                         | Transcription                                                                                              |
| <b>123185</b> | -487  | -481  | 6  | Myosin class V heavy chain                                                                                 | Cytoskeleton                                                                                               |
| <b>66844</b>  | -625  | -619  | 6  | Glycosylphosphatidylinositol anchor synthesis protein                                                      | Signal transduction mechanisms                                                                             |
| <b>110158</b> | -1136 | -1130 | 6  | Predicted small molecule transporter involved in cellular pH homeostasis (Batten disease protein in human) | General function prediction only                                                                           |
| <b>55912</b>  | -1113 | -1088 | 25 | Septin CDC10 and related P-loop GTPases                                                                    | Cell cycle control, cell division, chromosome partitioning / Signal transduction mechanisms / Cytoskeleton |
| <b>103470</b> | -1286 | -1276 | 10 | RNA-directed RNA polymerase QDE-1 required for posttranscriptional gene silencing and RNA interference     | RNA processing and modification                                                                            |
| <b>44878</b>  | -1369 | -1351 | 18 | Arp2/3 complex-interacting protein VIP1/Asp1, involved in regulation of actin cytoskeleton                 | Cytoskeleton                                                                                               |

|               |       |       |    |                                                                                                      |                                                                                             |
|---------------|-------|-------|----|------------------------------------------------------------------------------------------------------|---------------------------------------------------------------------------------------------|
| <b>2358</b>   | -1085 | -1055 | 30 | Diadenosine polyphosphate hydrolase and related proteins of the histidine triad (HIT) family         | Nucleotide transport and metabolism / General function prediction only                      |
| <b>2365</b>   | -1183 | -1175 | 8  | Putative N2,N2-dimethylguanosine tRNA methyltransferase                                              | RNA processing and modification                                                             |
| <b>21505</b>  | -945  | -924  | 21 | G-protein alpha subunit (small G protein superfamily)                                                | Cell cycle control, cell division, chromosome partitioning / Signal transduction mechanisms |
| <b>75069</b>  | -806  | -782  | 24 | Predicted membrane protein, contains DoH and Cytochrome b-561/ferric reductase transmembrane domains | Signal transduction mechanisms                                                              |
| <b>110636</b> | -1088 | -1082 | 6  | RRM motif-containing protein                                                                         | RNA processing and modification                                                             |
| <b>80961</b>  | -1208 | -1197 | 11 | Transcription factor TCF20                                                                           | Transcription                                                                               |
| <b>51212</b>  | -808  | -802  | 6  | 60S ribosomal protein L5                                                                             | Translation, ribosomal structure and biogenesis                                             |
| <b>67732</b>  | -1034 | -1017 | 17 | Multidrug resistance-associated protein/mitoxantrone resistance protein, ABC superfamily             | Secondary metabolites biosynthesis, transport and catabolism                                |
| <b>51455</b>  | -113  | -107  | 6  | ATP-dependent RNA helicase                                                                           | RNA processing and modification                                                             |
| <b>110949</b> | -1127 | -1115 | 12 | C-type lectin                                                                                        | Defense mechanisms / Signal transduction mechanisms                                         |
| <b>68122</b>  | -772  | -755  | 17 | Permease of the major facilitator superfamily                                                        | Carbohydrate transport and metabolism                                                       |
| <b>111192</b> | -1420 | -1411 | 9  | Nucleolar GTPase/ATPase p130                                                                         | Nuclear structure                                                                           |
| <b>111447</b> | -1281 | -1270 | 11 | Sulfatase                                                                                            | General function prediction only                                                            |
| <b>23276</b>  | -978  | -969  | 9  | VAMP-associated protein involved in inositol metabolism                                              | Intracellular trafficking, secretion, and vesicular transport                               |
| <b>81822</b>  | -491  | -461  | 30 | Leucyl-tRNA synthetase                                                                               | Translation, ribosomal structure and biogenesis                                             |
| <b>69651</b>  | -454  | -443  | 11 | Predicted transporter (major facilitator superfamily)                                                | General function prediction only                                                            |
| <b>75195</b>  | -438  | -432  | 6  | NADPH oxidase                                                                                        | Energy production and conversion                                                            |
| <b>75195</b>  | -432  | -420  | 12 | NADPH oxidase                                                                                        | Energy production and conversion                                                            |
| <b>120384</b> | -1062 | -1035 | 27 | Notchless-like WD40 repeat-containing protein                                                        | Function unknown                                                                            |
| <b>75383</b>  | -1447 | -1441 | 6  | Reductases with broad range of substrate specificities                                               | General function prediction only                                                            |
| <b>75403</b>  | -642  | -620  | 22 | Cysteine desulfurase NFS1                                                                            | Amino acid transport and metabolism                                                         |
| <b>104418</b> | -84   | -78   | 6  | Kynurenine 3-monooxygenase and related flavoprotein monooxygenases                                   | Energy production and conversion / General function prediction only                         |
| <b>75551</b>  | -1201 | -1174 | 27 | Predicted sugar kinase                                                                               | Carbohydrate transport and metabolism                                                       |
| <b>104593</b> | -166  | -157  | 9  | FOG: WD40 repeat                                                                                     | General function prediction only                                                            |
| <b>52521</b>  | -1252 | -1246 | 6  | Uncharacterized conserved protein                                                                    | Function unknown                                                                            |



|               |       |       |    |                                                                                                   |                                                                                                             |
|---------------|-------|-------|----|---------------------------------------------------------------------------------------------------|-------------------------------------------------------------------------------------------------------------|
| <b>6011</b>   | -538  | -514  | 24 | Phosphatidic acid-preferring phospholipase A1, contains DDHD domain                               | Intracellular trafficking, secretion, and vesicular transport / Lipid transport and metabolism              |
| <b>57870</b>  | -690  | -684  | 6  | Histones H3 and H4                                                                                | Chromatin structure and dynamics                                                                            |
| <b>104785</b> | -1099 | -1085 | 14 | Phosphoinositide phosphatase SAC1                                                                 | Lipid transport and metabolism                                                                              |
| <b>75845</b>  | -1442 | -1431 | 11 | Cysteine desulfurase NFS1                                                                         | Amino acid transport and metabolism                                                                         |
| <b>45980</b>  | -1431 | -1424 | 7  | Cell cycle control protein                                                                        | Transcription / Cell cycle control, cell division, chromosome partitioning / Signal transduction mechanisms |
| <b>57472</b>  | -201  | -187  | 14 | FOG: RRM domain                                                                                   | General function prediction only                                                                            |
| <b>76057</b>  | -761  | -753  | 8  | Vacuolar H <sup>+</sup> -ATPase V1 sector, subunit B                                              | Energy production and conversion                                                                            |
| <b>58011</b>  | -620  | -611  | 9  | FOG: Zn-finger                                                                                    | General function prediction only                                                                            |
| <b>57286</b>  | -1396 | -1373 | 23 | Histone H3 (Lys4) methyltransferase complex, subunit CPS25/DPY-30                                 | Transcription                                                                                               |
| <b>82651</b>  | -1170 | -1161 | 9  | Cullins                                                                                           | Cell cycle control, cell division, chromosome partitioning                                                  |
| <b>46463</b>  | -968  | -962  | 6  | Serine palmitoyltransferase                                                                       | Posttranslational modification, protein turnover, chaperones                                                |
| <b>46613</b>  | -161  | -155  | 6  | Predicted membrane protein                                                                        | Function unknown                                                                                            |
| <b>76700</b>  | -108  | -81   | 27 | FOG: Zn-finger                                                                                    | General function prediction only / Transcription                                                            |
| <b>105968</b> | -1071 | -1044 | 27 | Iron/ascorbate family oxidoreductases                                                             | Secondary metabolites biosynthesis, transport and catabolism / General function prediction only             |
| <b>76905</b>  | -1230 | -1203 | 27 | Flavin-containing monooxygenase                                                                   | Secondary metabolites biosynthesis, transport and catabolism                                                |
| <b>121298</b> | -1175 | -1145 | 30 | Glyoxylate/hydroxypyruvate reductase (D-isomer-specific 2-hydroxy acid dehydrogenase superfamily) | Energy production and conversion                                                                            |
| <b>121441</b> | -702  | -672  | 30 | Synaptic vesicle transporter SVOP and related transporters (major facilitator superfamily)        | General function prediction only                                                                            |
| <b>121529</b> | -1252 | -1227 | 25 | Mitochondrial carrier protein MRS3/4                                                              | Energy production and conversion                                                                            |
| <b>77495</b>  | -1064 | -1035 | 29 | Uncharacterized conserved protein                                                                 | Function unknown                                                                                            |
| <b>107014</b> | -248  | -239  | 9  | Nucleolar GTPase/ATPase p130                                                                      | Nuclear structure                                                                                           |
| <b>121786</b> | -1182 | -1168 | 14 | Uncharacterized conserved protein                                                                 | Function unknown                                                                                            |
| <b>62493</b>  | -384  | -372  | 12 | Chromatin remodeling complex RSC, subunit RSC1/Polybromo and related proteins                     | Transcription / Chromatin structure and dynamics                                                            |
| <b>27939</b>  | -964  | -953  | 11 | Predicted transporter (major facilitator superfamily)                                             | General function prediction only                                                                            |
| <b>70750</b>  | -1410 | -1395 | 15 | Vacuolar H <sup>+</sup> -ATPase V0 sector, subunit M9.7 (M9.2)                                    | Energy production and conversion                                                                            |
| <b>29619</b>  | -113  | -83   | 30 | Annexin                                                                                           | Intracellular trafficking, secretion, and vesicular transport                                               |

|               |       |       |    |                                                                                                                                           |                                                                                                                    |
|---------------|-------|-------|----|-------------------------------------------------------------------------------------------------------------------------------------------|--------------------------------------------------------------------------------------------------------------------|
| <b>34112</b>  | -1179 | -1166 | 13 | 60S ribosomal protein L22                                                                                                                 | Translation, ribosomal structure and biogenesis                                                                    |
| <b>69217</b>  | -1144 | -1121 | 23 | Cdk activating kinase (CAK)/RNA polymerase II transcription initiation/nucleotide excision repair factor TFIIH/TFIIK, kinase subunit CDK7 | Transcription / Replication, recombination and repair / Cell cycle control, cell division, chromosome partitioning |
| <b>30465</b>  | -158  | -152  | 6  | U4/U6 small nuclear ribonucleoprotein Prp4 (contains WD40 repeats)                                                                        | RNA processing and modification                                                                                    |
| <b>56872</b>  | -273  | -264  | 9  | Serine/threonine specific protein phosphatase involved in glycogen accumulation, PP2A-related                                             | Signal transduction mechanisms / Carbohydrate transport and metabolism                                             |
| <b>55969</b>  | -1040 | -1030 | 10 | Translation initiation factor 1A (eIF-1A)                                                                                                 | Translation, ribosomal structure and biogenesis                                                                    |
| <b>54471</b>  | -320  | -295  | 25 | Serine/threonine protein kinase                                                                                                           | Signal transduction mechanisms                                                                                     |
| <b>59546</b>  | -1191 | -1184 | 7  | Transcription coactivator                                                                                                                 | Transcription                                                                                                      |
| <b>41035</b>  | -1398 | -1389 | 9  | Calcium-responsive transcription coactivator                                                                                              | Transcription                                                                                                      |
| <b>69013</b>  | -1375 | -1369 | 6  | Uncharacterized conserved protein                                                                                                         | Function unknown                                                                                                   |
| <b>69013</b>  | -1369 | -1363 | 6  | Uncharacterized conserved protein                                                                                                         | Function unknown                                                                                                   |
| <b>33704</b>  | -835  | -822  | 13 | Transcription initiation factor TFIIID, subunit TAF9 (also component of histone acetyltransferase SAGA)                                   | Transcription                                                                                                      |
| <b>27649</b>  | -767  | -742  | 25 | FOG: Zn-finger                                                                                                                            | General function prediction only                                                                                   |
| <b>63092</b>  | -1377 | -1360 | 17 | Ribulose kinase and related carbohydrate kinases                                                                                          | Carbohydrate transport and metabolism                                                                              |
| <b>25244</b>  | -1165 | -1136 | 29 | FOG: Zn-finger                                                                                                                            | General function prediction only                                                                                   |
| <b>61032</b>  | -364  | -354  | 10 | FOG: RCC1 domain                                                                                                                          | Function unknown                                                                                                   |
| <b>39285</b>  | -405  | -399  | 6  | Predicted DNA methylase                                                                                                                   | Function unknown                                                                                                   |
| <b>55114</b>  | -1056 | -1029 | 27 | Nucleoside phosphatase                                                                                                                    | Nucleotide transport and metabolism                                                                                |
| <b>54736</b>  | -776  | -770  | 6  | ATP-dependent RNA helicase                                                                                                                | RNA processing and modification                                                                                    |
| <b>103131</b> | -597  | -591  | 6  | unknown protein                                                                                                                           | -                                                                                                                  |
| <b>53596</b>  | -505  | -489  | 16 | unknown protein                                                                                                                           | -                                                                                                                  |
| <b>78189</b>  | -218  | -212  | 6  | unknown protein                                                                                                                           | -                                                                                                                  |
| <b>62386</b>  | -257  | -246  | 11 | unknown protein                                                                                                                           | -                                                                                                                  |
| <b>62537</b>  | -1270 | -1258 | 12 | unknown protein                                                                                                                           | -                                                                                                                  |
| <b>62333</b>  | -1237 | -1211 | 26 | unknown protein                                                                                                                           | -                                                                                                                  |
| <b>71532</b>  | -715  | -686  | 29 | unknown protein                                                                                                                           | -                                                                                                                  |

|        |       |       |    |                 |   |
|--------|-------|-------|----|-----------------|---|
| 108025 | -1294 | -1270 | 24 | unknown protein | - |
| 4221   | -983  | -968  | 15 | unknown protein | - |
| 108202 | -245  | -236  | 9  | unknown protein | - |
| 108202 | -236  | -227  | 9  | unknown protein | - |
| 108573 | -574  | -565  | 9  | unknown protein | - |
| 108683 | -1011 | -981  | 30 | unknown protein | - |
| 79222  | -225  | -198  | 27 | unknown protein | - |
| 79222  | -198  | -171  | 27 | unknown protein | - |
| 79222  | -121  | -107  | 14 | unknown protein | - |
| 122576 | -1287 | -1281 | 6  | unknown protein | - |
| 79921  | -755  | -745  | 10 | unknown protein | - |
| 65572  | -201  | -182  | 19 | unknown protein | - |
| 80252  | -1433 | -1409 | 24 | unknown protein | - |
| 5011   | -622  | -616  | 6  | unknown protein | - |
| 123186 | -324  | -318  | 6  | unknown protein | - |
| 110159 | -978  | -972  | 6  | unknown protein | - |
| 110825 | -683  | -674  | 9  | unknown protein | - |
| 68026  | -841  | -835  | 6  | unknown protein | - |
| 81586  | -424  | -411  | 13 | unknown protein | - |
| 81586  | -411  | -405  | 6  | unknown protein | - |
| 81586  | -405  | -399  | 6  | unknown protein | - |
| 81586  | -399  | -393  | 6  | unknown protein | - |
| 81586  | -393  | -387  | 6  | unknown protein | - |
| 68876  | -1402 | -1389 | 13 | unknown protein | - |
| 68876  | -1389 | -1383 | 6  | unknown protein | - |
| 68876  | -1383 | -1377 | 6  | unknown protein | - |
| 68876  | -1377 | -1371 | 6  | unknown protein | - |
| 68876  | -1371 | -1365 | 6  | unknown protein | - |

|        |       |       |    |                 |   |
|--------|-------|-------|----|-----------------|---|
| 111439 | -1420 | -1402 | 18 | unknown protein | - |
| 68948  | -1395 | -1389 | 6  | unknown protein | - |
| 68948  | -1389 | -1383 | 6  | unknown protein | - |
| 123955 | -59   | -50   | 9  | unknown protein | - |
| 81979  | -1125 | -1116 | 9  | unknown protein | - |
| 104071 | -1404 | -1398 | 6  | unknown protein | - |
| 104419 | -17   | -11   | 6  | unknown protein | - |
| 56218  | -428  | -400  | 28 | unknown protein | - |
| 41699  | -920  | -896  | 24 | unknown protein | - |
| 57534  | -660  | -653  | 7  | unknown protein | - |
| 75935  | -879  | -869  | 10 | unknown protein | - |
| 105176 | -68   | -62   | 6  | unknown protein | - |
| 59073  | -774  | -767  | 7  | unknown protein | - |
| 58282  | -1373 | -1364 | 9  | unknown protein | - |
| 121091 | -1179 | -1154 | 25 | unknown protein | - |
| 106154 | -323  | -296  | 27 | unknown protein | - |
| 121337 | -741  | -735  | 6  | unknown protein | - |
| 106452 | -923  | -902  | 21 | unknown protein | - |
| 106452 | -726  | -720  | 6  | unknown protein | - |
| 60578  | -1093 | -1087 | 6  | unknown protein | - |
| 60422  | -21   | -12   | 9  | unknown protein | - |
| 107111 | -38   | -19   | 19 | unknown protein | - |
| 48178  | -71   | -41   | 30 | unknown protein | - |
| 54352  | -1375 | -1369 | 6  | unknown protein | - |
| 54426  | -343  | -334  | 9  | unknown protein | - |
| 103130 | -965  | -959  | 6  | unknown protein | - |
| 62198  | -1023 | -994  | 29 | unknown protein | - |
| 78706  | -1025 | -1016 | 9  | unknown protein | - |

|        |       |       |    |                 |   |
|--------|-------|-------|----|-----------------|---|
| 78706  | -1016 | -1007 | 9  | unknown protein | - |
| 78706  | -197  | -176  | 21 | unknown protein | - |
| 71676  | -231  | -222  | 9  | unknown protein | - |
| 63648  | -453  | -444  | 9  | unknown protein | - |
| 43418  | -1062 | -1043 | 19 | unknown protein | - |
| 65808  | -1246 | -1240 | 6  | unknown protein | - |
| 123256 | -1330 | -1321 | 9  | unknown protein | - |
| 103563 | -1396 | -1390 | 6  | unknown protein | - |
| 80685  | -1479 | -1472 | 7  | unknown protein | - |
| 80685  | -1472 | -1465 | 7  | unknown protein | - |
| 80685  | -1465 | -1458 | 7  | unknown protein | - |
| 67035  | -958  | -950  | 8  | unknown protein | - |
| 81149  | -1475 | -1461 | 14 | unknown protein | - |
| 51907  | -1468 | -1439 | 29 | unknown protein | - |
| 72488  | -369  | -356  | 13 | unknown protein | - |
| 56531  | -703  | -691  | 12 | unknown protein | - |
| 120407 | -1136 | -1127 | 9  | unknown protein | - |
| 75394  | -282  | -259  | 23 | unknown protein | - |
| 56259  | -530  | -508  | 22 | unknown protein | - |
| 111991 | -603  | -594  | 9  | unknown protein | - |
| 111991 | -594  | -588  | 6  | unknown protein | - |
| 111991 | -588  | -570  | 18 | unknown protein | - |
| 112212 | -223  | -196  | 27 | unknown protein | - |
| 105389 | -403  | -383  | 20 | unknown protein | - |
| 105520 | -761  | -755  | 6  | unknown protein | - |
| 105520 | -755  | -743  | 12 | unknown protein | - |
| 105520 | -743  | -737  | 6  | unknown protein | - |
| 105520 | -737  | -731  | 6  | unknown protein | - |

|               |       |       |    |                 |   |
|---------------|-------|-------|----|-----------------|---|
| <b>105524</b> | -995  | -986  | 9  | unknown protein | - |
| <b>58634</b>  | -744  | -738  | 6  | unknown protein | - |
| <b>121355</b> | -1442 | -1414 | 28 | unknown protein | - |
| <b>106444</b> | -1374 | -1358 | 16 | unknown protein | - |
| <b>60004</b>  | -1409 | -1388 | 21 | unknown protein | - |
| <b>60004</b>  | -1212 | -1206 | 6  | unknown protein | - |
| <b>60897</b>  | -234  | -220  | 14 | unknown protein | - |
| <b>60665</b>  | -1234 | -1224 | 10 | unknown protein | - |
| <b>3739</b>   | -1305 | -1288 | 17 | unknown protein | - |
| <b>121638</b> | -177  | -171  | 6  | unknown protein | - |
| <b>32204</b>  | -29   | -14   | 15 | unknown protein | - |
| <b>33058</b>  | -769  | -757  | 12 | unknown protein | - |
| <b>59703</b>  | -1203 | -1178 | 25 | unknown protein | - |
| <b>66865</b>  | -83   | -65   | 18 | unknown protein | - |
| <b>55698</b>  | -960  | -950  | 10 | unknown protein | - |
| <b>34353</b>  | -1035 | -1029 | 6  | unknown protein | - |
| <b>65817</b>  | -1389 | -1383 | 6  | unknown protein | - |
| <b>32293</b>  | -815  | -792  | 23 | unknown protein | - |
| <b>32293</b>  | -93   | -69   | 24 | unknown protein | - |
| <b>42953</b>  | -794  | -776  | 18 | unknown protein | - |
| <b>26163</b>  | -291  | -270  | 21 | unknown protein | - |

\*Positions of Sites 1 and 2 are relative to the gene start codon.
