# Supplementary material for: Deciphering the Cis-Regulatory Elements for XYR1 and CRE1 Regulators in Trichoderma reesei
Source: PubMed Central journal article supplement (PMC4062390; doi:10.1371/journal.pone.0099366), 2014-06-18
Supplement: pone.0099366.s006.pdf [file pone.0099366.s006.pdf]

**Tables S6.** Prediction of XYR1 binding sites on genes down regulated in a  $\Delta xyr1$  mutant induced with cellulose.

| Protein ID | Site 1* | Site 2 | Distance | Description                                                   | log2 FC ( $\Delta xyr1/wt$ ) | p-val       |
|------------|---------|--------|----------|---------------------------------------------------------------|------------------------------|-------------|
| 76210      | -614    | -590   | 24       | GH62 $\alpha$ -L-arabinofuranosidase ABF2                     | -8.404019511                 | 8.93E-100   |
| 76682      | -1180   | -1170  | 10       | PDR-type ABC transporters                                     | -5.425185968                 | 0.004432593 |
| 112031     | -272    | -246   | 26       | unique protein, secreted                                      | -4.786445676                 | 0.000000157 |
| 103012     | -1366   | -1338  | 28       | taurine catabolism dioxygenase, alpha-ketoglutarate dependent | -4.392656507                 | 4.1E-82     |
| 103012     | -1338   | -1322  | 16       | taurine catabolism dioxygenase, alpha-ketoglutarate dependent | -4.392656507                 | 4.1E-82     |
| 68230      | -390    | -376   | 14       | N-methylhydantoinase A/acetone carboxylase HyuA, beta subunit | -4.287190072                 | 0.00000867  |
| 110173     | -426    | -409   | 17       | unknown protein                                               | -3.825652012                 | 3.29E-20    |
| 68831      | -640    | -612   | 28       | GT $\alpha$ -1.2-mannosyltransferase                          | -3.772809949                 | 3.01E-26    |
| 82026      | -1077   | -1049  | 28       | trans-aconitate methyltransferase                             | -3.502482697                 | 3.69E-10    |
| 123251     | -995    | -980   | 15       | flavo-hemoglobin                                              | -3.084271181                 | 0.00000221  |
| 109234     | -1325   | -1295  | 30       | D-aminopeptidase                                              | -3.029118614                 | 1.84E-45    |
| 122778     | -1050   | -1039  | 11       | short chain dehydrogenase/reductase                           | -2.972230198                 | 0.00000107  |
| 64959      | -1145   | -1134  | 11       | phosphatidyl synthase                                         | -2.86576707                  | 0.000283823 |
| 121664     | -641    | -624   | 17       | Glutamate decarboxylase and related proteins                  | -2.660868678                 | 8.84E-27    |
| 121664     | -203    | -182   | 21       | Glutamate decarboxylase and related proteins                  | -2.660868678                 | 8.84E-27    |
| 77299      | -1013   | -998   | 15       | GH2 Exo- $\beta$ -D-glucosaminidase GLS93                     | -2.653128246                 | 5.94E-32    |
| 70803      | -745    | -734   | 11       | bifunctional catalase/peroxidase                              | -2.565881792                 | 1.43E-41    |
| 82235      | -240    | -228   | 12       | GH31 $\alpha$ -glucosidase                                    | -2.382019398                 | 7.48E-36    |
| 80019      | -1278   | -1248  | 30       | short-chain dehydrogenase/reductase                           | -2.346522643                 | 8.22E-36    |
| 122416     | -1100   | -1079  | 21       | NADH:flavin oxidoreductase/NADH oxidase                       | -2.191215477                 | 0.021716439 |
| 44362      | -637    | -613   | 24       | unknown protein                                               | -2.188442554                 | 1.32E-11    |
| 54768      | -1135   | -1124  | 11       | unknown protein                                               | -2.023759917                 | 2.82E-09    |
| 67035      | -1260   | -1231  | 29       | unknown protein                                               | -1.895382889                 | 0.009207258 |
| 51499      | -647    | -618   | 29       | ketol-acid reductoisomerase. mitochondrial precursor          | -1.754031926                 | 2.86E-20    |

|               |       |       |    |                                                                                   |              |             |
|---------------|-------|-------|----|-----------------------------------------------------------------------------------|--------------|-------------|
| <b>121605</b> | -459  | -431  | 28 | unknown protein                                                                   | -1.692958087 | 0.0000635   |
| <b>121082</b> | -825  | -804  | 21 | unique protein                                                                    | -1.681533485 | 2.57E-10    |
| <b>121894</b> | -243  | -232  | 11 | Zn2Cys6 transcriptional regulator                                                 | -1.681050265 | 8.37E-17    |
| <b>39637</b>  | -880  | -863  | 17 | C4-dicarboxylate transporter/malic acid transport protein                         | -1.646295211 | 0.000000231 |
| <b>82667</b>  | -749  | -720  | 29 | ThrB Homoserine kinase                                                            | -1.641776897 | 1.19E-12    |
| <b>73924</b>  | -346  | -332  | 14 | MDR-type ABC transporters                                                         | -1.616223561 | 4.9E-17     |
| <b>45445</b>  | -271  | -256  | 15 | tyrosinase                                                                        | -1.597808419 | 1.94E-17    |
| <b>45445</b>  | -256  | -235  | 21 | tyrosinase                                                                        | -1.597808419 | 1.94E-17    |
| <b>123614</b> | -370  | -347  | 23 | unknown protein                                                                   | -1.594060959 | 8.07E-18    |
| <b>108459</b> | -922  | -906  | 16 | carbamoyl-phosphate synthase (glutamine-hydrolyzing)arginine-specific large chain | -1.543820058 | 2E-16       |
| <b>68254</b>  | -618  | -604  | 14 | Zn2Cys6 transcriptional regulator                                                 | -1.531287544 | 0.002243848 |
| <b>4213</b>   | -587  | -565  | 22 | ribonuclease T2                                                                   | -1.49489293  | 1.63E-10    |
| <b>108586</b> | -1227 | -1217 | 10 | unknown protein                                                                   | -1.48693498  | 0.0000444   |
| <b>65711</b>  | -1393 | -1371 | 22 | SAM-dependent methyltransferase                                                   | -1.483172411 | 2.08E-12    |
| <b>70025</b>  | -681  | -658  | 23 | alcohol dehydrogenase. zinc-containing. putative                                  | -1.463905484 | 1.64E-08    |
| <b>123473</b> | -725  | -697  | 28 | MFS permease                                                                      | -1.45458798  | 1.14E-10    |
| <b>121826</b> | -454  | -434  | 20 | ATP citrate lyase. beta subunit                                                   | -1.403597391 | 2.05E-13    |
| <b>119902</b> | -1065 | -1040 | 25 | unique protein                                                                    | -1.388942427 | 0.000574214 |
| <b>124282</b> | -1339 | -1324 | 15 | unknown protein. SET and MYND domain                                              | -1.38125509  | 0.000022    |
| <b>61750</b>  | -1070 | -1056 | 14 | Sur2 sphinganine C4-hydroxylase of <i>Saccharomyces cerevisiae</i>                | -1.319795    | 0.001902816 |
| <b>61750</b>  | -105  | -76   | 29 | Sur2 sphinganine C4-hydroxylase of <i>Saccharomyces cerevisiae</i>                | -1.319795    | 0.001902816 |
| <b>122920</b> | -1098 | -1083 | 15 | Molecular chaperone Bip                                                           | -1.315108954 | 3.07E-11    |
| <b>122920</b> | -1083 | -1062 | 21 | Molecular chaperone Bip                                                           | -1.315108954 | 3.07E-11    |
| <b>78496</b>  | -1355 | -1333 | 22 | Flavin-containing monooxygenase Fmo1 like                                         | -1.29700035  | 4.25E-11    |
| <b>78496</b>  | -1333 | -1323 | 10 | Flavin-containing monooxygenase Fmo1 like                                         | -1.29700035  | 4.25E-11    |
| <b>49753</b>  | -800  | -790  | 10 | L-arabinitol 4-dehydrogenase                                                      | -1.291016577 | 7.14E-09    |
| <b>72339</b>  | -383  | -370  | 13 | GH18. chitinase CHI18-9                                                           | -1.277106166 | 9.42E-09    |
| <b>122579</b> | -499  | -481  | 18 | unknown protein. 4TM                                                              | -1.272554104 | 3.68E-09    |

|               |       |       |    |                                                               |              |             |
|---------------|-------|-------|----|---------------------------------------------------------------|--------------|-------------|
| <b>122579</b> | -481  | -468  | 13 | unknown protein. 4TM                                          | -1.272554104 | 3.68E-09    |
| <b>72643</b>  | -1338 | -1324 | 14 | arginosuccinate synthetase                                    | -1.271628185 | 7.45E-11    |
| <b>77481</b>  | -1179 | -1168 | 11 | D-xylulose 5-phosphate/D-fructose 6-phosphate phosphoketolase | -1.266046924 | 0.034863148 |
| <b>77481</b>  | -1168 | -1152 | 16 | D-xylulose 5-phosphate/D-fructose 6-phosphate phosphoketolase | -1.266046924 | 0.034863148 |
| <b>123131</b> | -167  | -150  | 17 | endonuclease/exonuclease/phosphatase. putative                | -1.239646639 | 0.00000104  |
| <b>120008</b> | -1332 | -1317 | 15 | GMC oxidoreductase                                            | -1.183531098 | 0.000000002 |
| <b>49649</b>  | -1334 | -1324 | 10 | unknown protein                                               | -1.154376595 | 1.43E-08    |
| <b>107670</b> | -1108 | -1088 | 20 | unknown protein                                               | -1.137040128 | 0.027299852 |
| <b>119609</b> | -1103 | -1093 | 10 | Phospho-2-dehydro-3-deoxyheptonate aldolase                   | -1.134155176 | 5.67E-08    |
| <b>120837</b> | -836  | -817  | 19 | unknown protein. 1 TM domain                                  | -1.132484858 | 5.68E-10    |
| <b>53246</b>  | -438  | -423  | 15 | unknown protein                                               | -1.110617242 | 3.86E-09    |
| <b>111994</b> | -496  | -482  | 14 | unknown protein                                               | -1.087373342 | 0.000000436 |
| <b>80058</b>  | -21   | -9    | 12 | MFS permease                                                  | -1.027646883 | 0.0000405   |
| <b>69171</b>  | -258  | -247  | 11 | unknown protein                                               | -1.012296116 | 0.036441159 |
| <b>75589</b>  | -376  | -360  | 16 | hydroxymethylglutaryl CoA synthase                            | -1.006759852 | 0.00000252  |
| <b>124113</b> | -677  | -664  | 13 | PTH11 GPCR                                                    | -1.004694118 | 0.000000122 |

\*Positions of Sites 1 and 2 are relative to the gene start codon.
