# Supplementary material for: Deciphering the Cis-Regulatory Elements for XYR1 and CRE1 Regulators in Trichoderma reesei
Source: PubMed Central journal article supplement (PMC4062390; doi:10.1371/journal.pone.0099366), 2014-06-18
Supplement: pone.0099366.s007.pdf [file pone.0099366.s007.pdf]

**Tables S7.** Prediction of XYR1 binding sites on genes up regulated in a *Δxyr1* mutant induced with cellulose.

| Protein ID | Site 1* | Site 2 | Distance | Description                                                          | log2 FC ( $\Delta xyr1/wt$ ) | p-val       |
|------------|---------|--------|----------|----------------------------------------------------------------------|------------------------------|-------------|
| 124175     | -1324   | -1299  | 25       | GH64 endo-1,3- $\beta$ -glucanase                                    | 3.536934872                  | 0.001695692 |
| 61142      | -302    | -280   | 22       | unknown protein                                                      | 2.942067817                  | 1.72E-41    |
| 57558      | -727    | -703   | 24       | unknown protein                                                      | 2.93145646                   | 1.33E-33    |
| 109278     | -380    | -358   | 22       | GH24 lysozyme                                                        | 2.691119136                  | 1.21E-10    |
| 123865     | -1491   | -1479  | 12       | Peptidase S8 and S53, subtilisin, kexin, sedolisin                   | 2.673350404                  | 3.64E-09    |
| 29716      | -832    | -804   | 28       | thiamine-repressible mitochondrial transport protein THI74, putative | 2.44392262                   | 5.87E-39    |
| 104180     | -1410   | -1384  | 26       | Ankyrin                                                              | 2.418346823                  | 2.28E-09    |
| 123911     | -609    | -583   | 26       | unknown protein                                                      | 2.32803859                   | 1.11E-22    |
| 40918      | -1150   | -1132  | 18       | unknown protein                                                      | 2.064471614                  | 1.6E-26     |
| 106457     | -830    | -811   | 19       | unknown protein                                                      | 2.033383557                  | 2.2E-26     |
| 70452      | -1411   | -1393  | 18       | flavin containing amine oxidoreductase                               | 2.028150258                  | 4.97E-15    |
| 70452      | -1393   | -1373  | 20       | flavin containing amine oxidoreductase                               | 2.028150258                  | 4.97E-15    |
| 67484      | -74     | -58    | 16       | AMP deaminase                                                        | 1.94091069                   | 2.59E-18    |
| 5007       | -1080   | -1051  | 29       | unknown protein                                                      | 1.940907236                  | 3.12E-08    |
| 62244      | -1385   | -1369  | 16       | Zn2Cys6 transcriptional regulator                                    | 1.933640298                  | 2.12E-18    |
| 64018      | -1010   | -993   | 17       | GPCR, mating type pheromone G-protein coupled receptor               | 1.898127037                  | 8.32E-19    |
| 120224     | -142    | -125   | 17       | C2H2 transcriptional regulator                                       | 1.849624272                  | 2.57E-23    |
| 123658     | -343    | -331   | 12       | unique protein                                                       | 1.796126706                  | 0.00000175  |
| 43129      | -492    | -465   | 27       | unknown protein                                                      | 1.787519363                  | 0.000576368 |
| 123241     | -772    | -755   | 17       | MFS permease                                                         | 1.763532244                  | 7.74E-09    |
| 65921      | -226    | -197   | 29       | Acetyl/propionyl-CoA carboxylase alpha subunit                       | 1.62109277                   | 8.08E-11    |
| 65921      | -197    | -177   | 20       | Acetyl/propionyl-CoA carboxylase alpha subunit                       | 1.62109277                   | 8.08E-11    |
| 47603      | -972    | -960   | 12       | succinyl-CoA:3-ketoacid-coenzyme A transferase subunit A             | 1.597300255                  | 0.000000717 |
| 121839     | -1277   | -1261  | 16       | HSP70                                                                | 1.471560323                  | 3.36E-09    |

|               |       |       |    |                                                                                                     |             |             |
|---------------|-------|-------|----|-----------------------------------------------------------------------------------------------------|-------------|-------------|
| <b>65615</b>  | -696  | -679  | 17 | RibosomalRNA methyltransferaseRrmJ/FtsJ domain.                                                     | 1.470196019 | 5.02E-12    |
| <b>53067</b>  | -1270 | -1260 | 10 | Zn2Cys6 transcriptional regulator                                                                   | 1.46394108  | 1.17E-12    |
| <b>104469</b> | -1193 | -1177 | 16 | unknown protein                                                                                     | 1.460363146 | 3.8E-16     |
| <b>65821</b>  | -450  | -437  | 13 | vacuolar targeting protein Atg18                                                                    | 1.38188595  | 8.63E-13    |
| <b>81756</b>  | -309  | -281  | 28 | unknown protein                                                                                     | 1.313582505 | 0.0000576   |
| <b>61819</b>  | -743  | -717  | 26 | unknown protein                                                                                     | 1.306390838 | 4.39E-08    |
| <b>111253</b> | -1093 | -1069 | 24 | unknown protein                                                                                     | 1.306340446 | 2.41E-08    |
| <b>111253</b> | -621  | -611  | 10 | unknown protein                                                                                     | 1.306340446 | 2.41E-08    |
| <b>23455</b>  | -534  | -519  | 15 | unknown protein                                                                                     | 1.276813859 | 6.15E-11    |
| <b>55679</b>  | -85   | -69   | 16 | unknown protein                                                                                     | 1.272451846 | 1.01E-10    |
| <b>123508</b> | -38   | -27   | 11 | unknown protein                                                                                     | 1.242351576 | 3.87E-09    |
| <b>69611</b>  | -1217 | -1188 | 29 | MFS permease                                                                                        | 1.233214194 | 3.67E-08    |
| <b>69611</b>  | -246  | -231  | 15 | MFS permease                                                                                        | 1.233214194 | 3.67E-08    |
| <b>76151</b>  | -517  | -493  | 24 | GT31 $\beta$ -glycosyltransferase                                                                   | 1.225525667 | 6.35E-10    |
| <b>111446</b> | -1316 | -1295 | 21 | Zn2Cys6 transcriptional regulator                                                                   | 1.189224202 | 0.00057895  |
| <b>111216</b> | -1352 | -1332 | 20 | histone H3 methyltransferase                                                                        | 1.175584913 | 1.81E-08    |
| <b>67579</b>  | -894  | -868  | 26 | phospholipase A2                                                                                    | 1.158968279 | 0.000000196 |
| <b>107715</b> | -1090 | -1060 | 30 | SSCRP                                                                                               | 1.148333876 | 0.002529392 |
| <b>55005</b>  | -768  | -756  | 12 | GT22 ALG9 mannosyltransferase                                                                       | 1.122654079 | 4.04E-08    |
| <b>23190</b>  | -128  | -107  | 21 | mRNA cleavage factor complex II protein Clp1, putative                                              | 1.101035304 | 1.67E-08    |
| <b>121065</b> | -848  | -835  | 13 | unknown protein                                                                                     | 1.092209544 | 0.000000106 |
| <b>49873</b>  | -942  | -916  | 26 | transcriptional regulator, unknown                                                                  | 1.071764481 | 1.63E-08    |
| <b>104333</b> | -665  | -653  | 12 | unknown protein                                                                                     | 1.063570219 | 0.000000459 |
| <b>74731</b>  | -468  | -438  | 30 | beta-adaptin, apl1, large subunit of the adaptor protein complex (AP-2) of clathrin-coated vesicles | 1.051308628 | 2.31E-08    |
| <b>59778</b>  | -273  | -256  | 17 | GPCR, related to A nidulans GprC                                                                    | 1.042224749 | 0.0000014   |
| <b>57513</b>  | -89   | -65   | 24 | MAPKK, mitogen activated protein kinase kinase Ssk2p                                                | 1.018806038 | 0.000000282 |

\*Positions of Sites 1 and 2 are relative to the gene start codon.
