# Supplementary material for: Deciphering the Cis-Regulatory Elements for XYR1 and CRE1 Regulators in Trichoderma reesei
Source: PubMed Central journal article supplement (PMC4062390; doi:10.1371/journal.pone.0099366), 2014-06-18
Supplement: pone.0099366.s008.pdf [file pone.0099366.s008.pdf]

**Tables S8.** Prediction of XYR1 binding sites on genes down regulated in a *Δxyr1* mutant induced with sophorose.

| Protein ID | Site 1* | Site 2 | Distance | Description                                        | log2 FC ( $\Delta xyr1/wt$ ) | p-val       |
|------------|---------|--------|----------|----------------------------------------------------|------------------------------|-------------|
| 123261     | -939    | -920   | 19       | unknown protein                                    | -2.99670971                  | 1.28E-33    |
| 123261     | -742    | -732   | 10       | unknown protein                                    | -2.99670971                  | 1.28E-33    |
| 123261     | -681    | -663   | 18       | unknown protein                                    | -2.99670971                  | 1.28E-33    |
| 44278      | -860    | -847   | 13       | Rab geranyl transferase escort protein             | -2.120576253                 | 3.95E-17    |
| 123084     | -68     | -43    | 25       | chloroperoxidase                                   | -1.85817748                  | 0.003089378 |
| 119860     | -1391   | -1379  | 12       | unknown protein                                    | -1.797021174                 | 7.57E-13    |
| 120943     | -296    | -270   | 26       | NAD-dependent glutamate dehydrogenase              | -1.788918503                 | 1.01E-10    |
| 121121     | -83     | -56    | 27       | Zn2Cys6 transcriptional regulator                  | -1.772560265                 | 5.13E-11    |
| 21960      | -1147   | -1130  | 17       | phospholipase C                                    | -1.682812431                 | 9.23E-10    |
| 81756      | -309    | -281   | 28       | unknown protein                                    | -1.59792776                  | 6.06E-12    |
| 109317     | -150    | -126   | 24       | unknown protein                                    | -1.585583444                 | 6.11E-10    |
| 79960      | -907    | -882   | 25       | GH47 $\alpha$ -1,2-mannosidase                     | -1.442723348                 | 1.2E-09     |
| 56780      | -91     | -72    | 19       | DNA polymerase X family                            | -1.418313101                 | 3.64E-08    |
| 122043     | -224    | -206   | 18       | unknown protein                                    | -1.379370847                 | 4.21E-09    |
| 58381      | -1364   | -1337  | 27       | unknown protein                                    | -1.372650179                 | 1.16E-08    |
| 58381      | -1337   | -1318  | 19       | unknown protein                                    | -1.372650179                 | 1.16E-08    |
| 122724     | -1106   | -1078  | 28       | unknown protein, only in neurospora and Chaetomium | -1.351846176                 | 0.000000751 |
| 123865     | -1491   | -1479  | 12       | Peptidase S8 and S53, subtilisin, kexin, sedolisin | -1.337624888                 | 0.00000273  |
| 122076     | -785    | -773   | 12       | aspartyl protease                                  | -1.283009181                 | 0.000000238 |
| 122076     | -773    | -746   | 27       | aspartyl protease                                  | -1.283009181                 | 0.000000238 |
| 103063     | -1332   | -1312  | 20       | unknown protein                                    | -1.20931519                  | 0.00000494  |
| 75394      | -1321   | -1310  | 11       | unknown protein                                    | -1.198644528                 | 0.010961175 |
| 121065     | -848    | -835   | 13       | unknown protein                                    | -1.183685907                 | 0.00000701  |
| 121839     | -1277   | -1261  | 16       | HSP70                                              | -1.156469003                 | 0.0000016   |

|               |       |       |    |                                                                                                                 |              |             |
|---------------|-------|-------|----|-----------------------------------------------------------------------------------------------------------------|--------------|-------------|
| <b>36391</b>  | -89   | -77   | 12 | C2H2 transcriptional regulator                                                                                  | -1.127299804 | 0.00000192  |
| <b>104219</b> | -455  | -426  | 29 | unknown protein                                                                                                 | -1.118833451 | 0.022674252 |
| <b>120224</b> | -142  | -125  | 17 | C2H2 transcriptional regulator                                                                                  | -1.116675465 | 0.0000031   |
| <b>65921</b>  | -226  | -197  | 29 | Acetyl/propionyl-CoA carboxylase alpha subunit                                                                  | -1.088095997 | 0.0000587   |
| <b>65921</b>  | -197  | -177  | 20 | Acetyl/propionyl-CoA carboxylase alpha subunit                                                                  | -1.088095997 | 0.0000587   |
| <b>121107</b> | -1258 | -1246 | 12 | Zn2Cys6 transcriptional regulator                                                                               | -1.085030781 | 0.00000534  |
| <b>121107</b> | -94   | -74   | 20 | Zn2Cys6 transcriptional regulator                                                                               | -1.085030781 | 0.00000534  |
| <b>111103</b> | -223  | -208  | 15 | unknown protein                                                                                                 | -1.079135101 | 0.00000389  |
| <b>53596</b>  | -338  | -328  | 10 | unknown protein                                                                                                 | -1.078876955 | 0.0000233   |
| <b>68291</b>  | -1167 | -1137 | 30 | pyruvate formate lyase activating enzyme (radical SAM superfamily)                                              | -1.067242861 | 0.000045    |
| <b>47603</b>  | -972  | -960  | 12 | succinyl-CoA:3-ketoacid-coenzyme A transferase subunit A                                                        | -1.055195306 | 0.0000152   |
| <b>57322</b>  | -165  | -155  | 10 | ARO Transcriptional regulators containing a DNA-binding HTH domain and an aminotransferase domain (MocR family) | -1.043339166 | 0.0000907   |

\*Positions of Sites 1 and 2 are relative to the gene start codon.
