# Supplementary material for: Deciphering the Cis-Regulatory Elements for XYR1 and CRE1 Regulators in Trichoderma reesei
Source: PubMed Central journal article supplement (PMC4062390; doi:10.1371/journal.pone.0099366), 2014-06-18
Supplement: pone.0099366.s009.pdf [file pone.0099366.s009.pdf]

**Tables S9.** Prediction of XYR1 binding sites on genes up regulated in a *Δxyr1* mutant induced with sophorose.

| Protein ID | Site 1* | Site 2 | Distance | Description                                                                                          | log2 FC ( <i>Δxyr1</i> /wt) | p-val       |
|------------|---------|--------|----------|------------------------------------------------------------------------------------------------------|-----------------------------|-------------|
| 52315      | -211    | -201   | 10       | copper transporter Ctr                                                                               | 9.504438019                 | 2.73E-35    |
| 111094     | -116    | -93    | 23       | CBM 13                                                                                               | 6.543550884                 | 2.49E-75    |
| 82321      | -980    | -956   | 24       | Aquaporin                                                                                            | 4.449578196                 | 8.05E-29    |
| 82321      | -878    | -861   | 17       | Aquaporin                                                                                            | 4.449578196                 | 8.05E-29    |
| 82321      | -543    | -526   | 17       | Aquaporin                                                                                            | 4.449578196                 | 8.05E-29    |
| 58717      | -431    | -403   | 28       | β-lactamase class C                                                                                  | 3.919694582                 | 0.000000482 |
| 123777     | -91     | -73    | 18       | unique protein                                                                                       | 2.661861668                 | 2.36E-10    |
| 2316       | -560    | -547   | 13       | unknown protein with caleosin domain                                                                 | 2.28910924                  | 0.000472964 |
| 2316       | -547    | -519   | 28       | unknown protein with caleosin domain                                                                 | 2.28910924                  | 0.000472964 |
| 82327      | -161    | -151   | 10       | PDR-type ABC transporters                                                                            | 2.021735018                 | 0.011071885 |
| 106039     | -1022   | -994   | 28       | Ribosomal protein S28 based on homology to the corresponding protein of <i>Neurospora crassa</i> .   | 1.956909629                 | 0.003884709 |
| 106039     | -517    | -489   | 28       | Ribosomal protein S28 based on homology to the corresponding protein of <i>Neurospora crassa</i> .   | 1.956909629                 | 0.003884709 |
| 79238      | -1149   | -1129  | 20       | unknown protein                                                                                      | 1.766548107                 | 2.06E-10    |
| 2451       | -1437   | -1414  | 23       | Secretion related small GTPase Rab6/Ypt6/Ryh1                                                        | 1.73915014                  | 1.04E-12    |
| 78233      | -712    | -684   | 28       | 40s ribosomal protein S21 based on homology to the corresponding protein in <i>Gibberella zeae</i> . | 1.646507965                 | 0.000419782 |
| 34306      | -887    | -857   | 30       | mitochondrial cytochrome c oxidase assembly factor, putative                                         | 1.590507454                 | 5.83E-08    |
| 120983     | -939    | -922   | 17       | uracil phosphoribosyl transferase                                                                    | 1.563816786                 | 0.0000831   |
| 54768      | -1135   | -1124  | 11       | unknown protein                                                                                      | 1.557910829                 | 0.00419456  |
| 105263     | -1264   | -1254  | 10       | Zn2Cys6 transcriptional regulator                                                                    | 1.528914054                 | 2.13E-08    |
| 68107      | -1497   | -1475  | 22       | Ribosomal protein S30 by homology with the corresponding protein of <i>Ashbya gossypii</i> .         | 1.513847592                 | 0.001069802 |
| 123176     | -754    | -731   | 23       | 60S ribosomal protein L12 (L11 family).                                                              | 1.439191543                 | 0.010242256 |
| 81930      | -166    | -139   | 27       | HAM1-like protein, probably related to DNA-repair                                                    | 1.411901826                 | 0.000000243 |
| 120621     | -661    | -649   | 12       | ribosomal protein L37 of the large (60S) ribosomal subunit. Belongs to the same family as            | 1.404554321                 | 2.43E-09    |

| yeast Rpl33Ap and has similarity to rat L35a. |       |       |    |                                                                                                                    |  |             |             |
|-----------------------------------------------|-------|-------|----|--------------------------------------------------------------------------------------------------------------------|--|-------------|-------------|
| 105003                                        | -1390 | -1365 | 25 | unknown protein                                                                                                    |  | 1.40290366  | 3.52E-08    |
| 123773                                        | -863  | -851  | 12 | Ubiquitin-conjugating enzyme                                                                                       |  | 1.382287706 | 3.96E-09    |
| 103147                                        | -1478 | -1459 | 19 | unknown protein                                                                                                    |  | 1.339385207 | 1.18E-08    |
| 53947                                         | -1259 | -1248 | 11 | HFBs                                                                                                               |  | 1.33236182  | 6.5E-09     |
| 119989                                        | -380  | -354  | 26 | HFB2                                                                                                               |  | 1.327482056 | 0.001596848 |
| 121903                                        | -74   | -53   | 21 | iron-sulfur cluster assembly accessory protein, putative                                                           |  | 1.316702511 | 0.000000156 |
| 80206                                         | -705  | -688  | 17 | unknown protein                                                                                                    |  | 1.27696843  | 0.00000183  |
| 21170                                         | -599  | -582  | 17 | Ribosomal protein S12                                                                                              |  | 1.261659674 | 0.0000679   |
| 71559                                         | -1435 | -1415 | 20 | Translation initiation factor eIF-5A gene based on homologyToThe corresponding genes in several filamentous fungi. |  | 1.230204974 | 0.000000141 |
| 71559                                         | -672  | -645  | 27 | Translation initiation factor eIF-5A gene based on homologyToThe corresponding genes in several filamentous fungi. |  | 1.230204974 | 0.000000141 |
| 103487                                        | -140  | -123  | 17 | glutathione S transferase                                                                                          |  | 1.198183712 | 0.009117042 |
| 79324                                         | -953  | -937  | 16 | nucleoside-diphosphate-sugar epimerase, putative (check!)                                                          |  | 1.196939533 | 0.002519593 |
| 40775                                         | -1386 | -1362 | 24 | RTA1 protein, 7 TNM, responds to xenobiotic stimulus                                                               |  | 1.170915772 | 0.00000239  |
| 74580                                         | -543  | -514  | 29 | unknown protein, 3 TM domains                                                                                      |  | 1.153726051 | 0.000000704 |
| 64874                                         | -892  | -865  | 27 | MFS toxin efflux pump                                                                                              |  | 1.122511743 | 0.002675252 |
| 49308                                         | -741  | -711  | 30 | unknown protein                                                                                                    |  | 1.106942966 | 0.001806411 |
| 123202                                        | -44   | -22   | 22 | 60s ribosomal protein rla2                                                                                         |  | 1.100430395 | 0.035956414 |
| 80709                                         | -672  | -642  | 30 | pre-mRNA-splicing factor CWC21, putative                                                                           |  | 1.09788588  | 0.000504897 |
| 75447                                         | -1346 | -1324 | 22 | unknown protein                                                                                                    |  | 1.095846806 | 0.000012    |
| 121003                                        | -1393 | -1377 | 16 | Ribosomal protein S18, S13 family                                                                                  |  | 1.080354899 | 0.000103867 |
| 49649                                         | -1334 | -1324 | 10 | unknown protein                                                                                                    |  | 1.080293983 | 0.006004053 |
| 72643                                         | -1338 | -1324 | 14 | arginosuccinate synthetase                                                                                         |  | 1.07930415  | 0.049072183 |
| 74807                                         | -661  | -633  | 28 | GH76 GPI-anchored $\alpha$ -1,6-mannanase                                                                          |  | 1.067670775 | 0.00000811  |
| 74807                                         | -601  | -580  | 21 | GH76 GPI-anchored $\alpha$ -1,6-mannanase                                                                          |  | 1.067670775 | 0.00000811  |
| 120184                                        | -658  | -646  | 12 | v-SNARE Ykt6; trafficking to and within Golgi, endocytic trafficking to vacuole, vacuolar fusion                   |  | 1.061753909 | 0.0000164   |
| 60768                                         | -1129 | -1112 | 17 | unknown protein                                                                                                    |  | 1.061479399 | 0.0000555   |

|               |       |       |    |                                                                     |             |             |
|---------------|-------|-------|----|---------------------------------------------------------------------|-------------|-------------|
| <b>81541</b>  | -1157 | -1129 | 28 | unknown protein                                                     | 1.060246101 | 0.00000798  |
| <b>121449</b> | -638  | -627  | 11 | IGPDImidazoleglycerol-phosphate dehydratase                         | 1.057590989 | 0.0000797   |
| <b>121620</b> | -252  | -240  | 12 | NMT1 thiamine biosynthesis protein                                  | 1.043177408 | 0.0000188   |
| <b>80115</b>  | -1402 | -1372 | 30 | unknown protein                                                     | 1.034816624 | 0.027880534 |
| <b>63813</b>  | -319  | -290  | 29 | cytochrome b5, putative                                             | 1.032997124 | 0.00022569  |
| <b>123659</b> | -859  | -842  | 17 | cell wall protein, instantly related to <i>S. cerevisiae</i> Pir3p. | 1.023034243 | 0.001376401 |
| <b>21396</b>  | -83   | -63   | 20 | sugar isomerase                                                     | 1.020934128 | 0.003012859 |

\*Positions of Sites 1 and 2 are relative to the gene start codon.
