# Supplementary material for: Deciphering the Cis-Regulatory Elements for XYR1 and CRE1 Regulators in Trichoderma reesei
Source: PubMed Central journal article supplement (PMC4062390; doi:10.1371/journal.pone.0099366), 2014-06-18
Supplement: pone.0099366.s010.pdf [file pone.0099366.s010.pdf]

**Tables S10.** Prediction of CRE1 binding sites on genes down regulated in a *Δcre1* mutant induced with sophorose.

| Protein ID | Site 1* | Site 2 | Distance | Description                                                                                                                 | log2 FC ( <i>Δcre1</i> /wt) | p-val       |
|------------|---------|--------|----------|-----------------------------------------------------------------------------------------------------------------------------|-----------------------------|-------------|
| 79816      | -1274   | -1263  | 11       | unknown protein; secreted                                                                                                   | -5.385291084                | 2.55192E-14 |
| 65817      | -1389   | -1383  | 6        | GT α-1,3-mannosyltransferase CMT1                                                                                           | -2.231489889                | 0.003331794 |
| 45369      | -253    | -234   | 19       | unknown protein                                                                                                             | -1.992724343                | 0.027684054 |
| 109394     | -551    | -540   | 11       | Zn2Cys6 transcriptional regulator                                                                                           | -1.814824402                | 4.16711E-05 |
| 105968     | -1071   | -1044  | 27       | Iron/ascorbate family oxidoreductases                                                                                       | -1.600400403                | 1.97426E-05 |
| 105968     | -1044   | -1038  | 6        | Iron/ascorbate family oxidoreductases                                                                                       | -1.600400403                | 1.97426E-05 |
| 74020      | -1033   | -1013  | 20       | Orotidine 5'-phosphate decarboxylase                                                                                        | -1.506293889                | 2.40655E-05 |
| 67902      | -103    | -75    | 28       | unknown secreted protein                                                                                                    | -1.401912143                | 0.000136991 |
| 54991      | -893    | -884   | 9        | short chain dehydrogenase/reductase                                                                                         | -1.33688536                 | 0.002172725 |
| 111102     | -308    | -302   | 6        | Phospholipase C, related to <i>Listeria monocytogenes</i> PlcA (Evalue 1.62e-21), has a homologue in <i>Gibberella zeae</i> | -1.250032843                | 0.004555341 |
| 111102     | -302    | -296   | 6        | Phospholipase C, related to <i>Listeria monocytogenes</i> PlcA (Evalue 1.62e-21), has a homologue in <i>Gibberella zeae</i> | -1.250032843                | 0.004555341 |
| 65965      | -350    | -326   | 24       | unknown protein                                                                                                             | -1.245144034                | 0.020763966 |
| 65209      | -583    | -576   | 7        | unknown protein                                                                                                             | -1.215083263                | 0.003346476 |
| 64330      | -1360   | -1346  | 14       | indoleamine 2,3-dioxygenase                                                                                                 | -1.123158182                | 0.017803494 |
| 121091     | -1179   | -1154  | 25       | unknown protein                                                                                                             | -1.089910257                | 0.04052763  |
| 46613      | -161    | -155   | 6        | unknown protein                                                                                                             | -1.08906378                 | 0.019306546 |
| 80234      | -1405   | -1388  | 17       | unknown protein                                                                                                             | -1.038954894                | 0.010277693 |
| 122576     | -1287   | -1281  | 6        | unknown protein                                                                                                             | -1.025321386                | 0.006051123 |
| 63558      | -136    | -125   | 11       | unknown protein                                                                                                             | -1.024669032                | 0.006300146 |

\*Positions of Sites 1 and 2 are relative to the gene start codon.
