# Supplementary material for: Deciphering the Cis-Regulatory Elements for XYR1 and CRE1 Regulators in Trichoderma reesei
Source: PubMed Central journal article supplement (PMC4062390; doi:10.1371/journal.pone.0099366), 2014-06-18
Supplement: pone.0099366.s011.pdf [file pone.0099366.s011.pdf]

**Tables S11.** Prediction of CRE1 binding sites on genes up regulated in a *Δcre1* mutant induced with sophorose.

| Protein ID | Site 1* | Site 2 | Distance | Description                                                                                                                 | log2 FC ( <i>Δcre1</i> /wt) | p-val       |
|------------|---------|--------|----------|-----------------------------------------------------------------------------------------------------------------------------|-----------------------------|-------------|
| 47710      | -802    | -793   | 9        | MFS permease                                                                                                                | 5.469366622                 | 4.09589E-19 |
| 122208     | -563    | -545   | 18       | Zn2Cys6 transcriptional regulator                                                                                           | 5.191488284                 | 4.56595E-43 |
| 50618      | -1150   | -1139  | 11       | MFS permease                                                                                                                | 3.902106195                 | 0.00012398  |
| 30465      | -158    | -152   | 6        | unknown protein, WD-repeats                                                                                                 | 3.725897747                 | 1.02183E-23 |
| 67035      | -958    | -950   | 8        | unknown protein                                                                                                             | 3.33305303                  | 1.7282E-18  |
| 102437     | -1321   | -1312  | 9        | unique protein, secreted                                                                                                    | 3.28066688                  | 7.45471E-16 |
| 58282      | -1373   | -1364  | 9        | esterase family 9                                                                                                           | 2.874624778                 | 1.93535E-05 |
| 45624      | -750    | -742   | 8        | unknown protein                                                                                                             | 2.568530973                 | 1.56194E-11 |
| 104081     | -657    | -651   | 6        | coenzyme F420-dependent N5,N10-methylene tetrahydromethanopterin reductase                                                  | 2.528127187                 | 0.010505112 |
| 122240     | -337    | -328   | 9        | Carnitine o-acyltransferase                                                                                                 | 2.477747967                 | 1.5277E-05  |
| 47930      | -619    | -613   | 6        | Mitochondrial oxoglutarate/malate carrier proteins                                                                          | 2.206416088                 | 0.030496393 |
| 121298     | -1175   | -1145  | 30       | formate dehydrogenase                                                                                                       | 2.062016661                 | 4.69598E-06 |
| 52438      | -1459   | -1445  | 14       | unknown protein                                                                                                             | 2.043845388                 | 0.010394571 |
| 41035      | -1398   | -1389  | 9        | G-protein coupled receptor protein, contains Molluscan rhodopsine C-terminal tail, possibly involved in signal transduction | 1.983074388                 | 0.015155077 |
| 21873      | -889    | -883   | 6        | dihydrunknown protein-acid dehydratase                                                                                      | 1.927417882                 | 1.11511E-05 |
| 79345      | -1160   | -1151  | 9        | unknown protein, Mpv17/PMP22 family                                                                                         | 1.854222421                 | 0.011982586 |
| 68122      | -772    | -755   | 17       | MFS permease                                                                                                                | 1.782944386                 | 0.029145175 |
| 119823     | -678    | -669   | 9        | SAM-dependent methyltransferases                                                                                            | 1.768952938                 | 0.015155077 |
| 122376     | -1095   | -1086  | 9        | unknown protein                                                                                                             | 1.641915423                 | 1.5277E-05  |
| 122886     | -1345   | -1332  | 13       | Tubulin beta chain 2                                                                                                        | 1.573645136                 | 3.08517E-05 |
| 122886     | -1332   | -1305  | 27       | Tubulin beta chain 2                                                                                                        | 1.573645136                 | 3.08517E-05 |
| 120826     | -1135   | -1119  | 16       | unknown protein                                                                                                             | 1.568740312                 | 0.00228747  |
| 120826     | -1119   | -1094  | 25       | unknown protein                                                                                                             | 1.568740312                 | 0.00228747  |

|               |       |       |    |                                                                                          |             |             |
|---------------|-------|-------|----|------------------------------------------------------------------------------------------|-------------|-------------|
| <b>107187</b> | -1093 | -1077 | 16 | unknown protein                                                                          | 1.557728986 | 0.000267422 |
| <b>123227</b> | -1379 | -1369 | 10 | unknown protein                                                                          | 1.517397555 | 0.002920578 |
| <b>45912</b>  | -1240 | -1228 | 12 | 60s ribosomal protein L36 based on homology to the corresponding protein in other fungi. | 1.511037344 | 0.000532228 |
| <b>76136</b>  | -166  | -140  | 26 | unknown protein                                                                          | 1.502298385 | 0.003329457 |
| <b>81676</b>  | -463  | -457  | 6  | salicylate hydroxylase                                                                   | 1.40398715  | 0.000248049 |
| <b>34112</b>  | -1179 | -1166 | 13 | ribosomal protein L22.                                                                   | 1.379697699 | 2.40481E-05 |
| <b>121074</b> | -194  | -188  | 6  | homeobox transcriptional regulator                                                       | 1.357140841 | 0.014697572 |
| <b>47221</b>  | -30   | -21   | 9  | Nucleoside diphosphate kinase                                                            | 1.319151266 | 0.000188665 |
| <b>123771</b> | -48   | -36   | 12 | GCD, Glutaryl-CoA dehydrogenase                                                          | 1.245877242 | 0.001931575 |
| <b>75890</b>  | -1466 | -1441 | 25 | C1 tetrahydrofolate synthase, putative                                                   | 1.160734188 | 0.000773167 |
| <b>79329</b>  | -306  | -276  | 30 | MFS permease                                                                             | 1.15937328  | 0.006300146 |
| <b>79329</b>  | -276  | -264  | 12 | MFS permease                                                                             | 1.15937328  | 0.006300146 |
| <b>80231</b>  | -545  | -528  | 17 | glucokinase                                                                              | 1.146707514 | 0.006227884 |
| <b>80231</b>  | -133  | -127  | 6  | glucokinase                                                                              | 1.146707514 | 0.006227884 |
| <b>121915</b> | -894  | -884  | 10 | Translationally-controlled tumor protein homolog                                         | 1.126868825 | 0.001284327 |
| <b>121820</b> | -279  | -270  | 9  | Methionine_synthMethionine synthasevitamin-B independent                                 | 1.105413674 | 0.002007961 |

\*Positions of Sites 1 and 2 are relative to the gene start codon.

## References

1. Castro, L.D., Antonieto, A.C., Pedersoli, W.R., Rocha, R.S., Persinoti, G.F. and Silva, R.N. (2014) Expression pattern of cellulolytic and xylanolytic genes regulated by transcriptional factors XYR1 and CRE1 are affected by carbon source in *Trichoderma reesei*. *Gene expression patterns : GEP*.
